Large vesicle extrusions from *C. elegans* neurons are consumed and stimulated by glial-like phagocytosis activity of the neighboring cell

Yu Wang<sup>1</sup>, Meghan Lee Arnold<sup>1</sup>, Anna Joelle Smart<sup>1</sup>, Guoqiang Wang<sup>1</sup>, Rebecca J. Androwski<sup>1</sup>, Andres Morera<sup>1</sup>, Ken C. Nguyen<sup>3</sup>, Peter J. Schweinsberg<sup>1</sup>, Ge Bai<sup>1</sup>, Jason Cooper<sup>1</sup>, David H. Hall<sup>3</sup>, Monica Driscoll<sup>1</sup>, and Barth D. Grant<sup>1,2</sup>

<sup>1</sup>Department of Molecular Biology and Biochemistry

Rutgers University, Piscataway, NJ USA, 08855

<sup>2</sup>Rutgers Center for Lipid Research

<sup>3</sup>Department of Neuroscience

Albert Einstein College of Medicine, Rose F. Kennedy Center, Bronx, New York 10461

Corresponding Author: Barth D. Grant

Email Address: [barthgra@dls.rutgers.edu](mailto:barthgra@dls.rutgers.edu)

Tel: 848-445-7339

## 1 **ABSTRACT**

2  
3 *C. elegans* neurons under stress can produce giant vesicles, several microns in diameter, called exophers.  
4 Current models suggest that exophers are neuroprotective, providing a mechanism for stressed neurons to eject  
5 toxic protein aggregates and organelles. However, little is known of the fate of the exopher once it leaves the  
6 neuron. We found that exophers produced by mechanosensory neurons in *C. elegans* are engulfed by  
7 surrounding hypodermal skin cells and are then broken up into numerous smaller vesicles that acquire  
8 hypodermal phagosome maturation markers, with vesicular contents gradually degraded by hypodermal  
9 lysosomes. Consistent with the hypodermis acting as an exopher phagocyte, we found that exopher removal  
10 requires hypodermal actin and Arp2/3, and the hypodermal plasma membrane adjacent to newly formed  
11 exophers accumulates dynamic F-actin during budding. Efficient fission of engulfed exopher-phagosomes to  
12 produce smaller vesicles and degrade their contents requires phagosome maturation factors SAND-1/Mon1,  
13 GTPase RAB-35, the CNT-1 ARF-GAP, and microtubule motor associated GTPase ARL-8, suggesting a close  
14 coupling of phagosome fission and phagosome maturation. Lysosome activity was required to degrade exopher  
15 contents in the hypodermis but not for exopher-phagosome resolution into smaller vesicles. Importantly, we  
16 found that GTPase ARF-6 and effector SEC-10/Exocyst activity in the hypodermis, along with the CED-1  
17 phagocytic receptor, is required for efficient production of exophers by the neuron. Our results indicate that the  
18 neuron requires specific interaction with the phagocyte for an efficient exopher response, a mechanistic feature  
19 potentially conserved with mammalian exophogenesis, and similar to neuronal pruning by phagocytic glia that  
20 influences neurodegenerative disease.

21  
22  
23  
24  
25  
26

27

## 28 INTRODUCTION

29

30 Cells expend a great deal of energy and resources to maintain the quality of their active proteome, matching  
31 expression with degradation, sensing and regulating protein folding and protein complex assembly via  
32 chaperone systems, and employing several types of protein degradation systems to remove damaged or  
33 aggregated protein products [1]. As long-lived cells that typically cannot divide, neurons may be especially  
34 vulnerable to loss of proteostasis equilibrium, with protein aggregation proposed as a common element in the  
35 pathophysiology of several prevalent neurodegenerative diseases [2]. In some cases, transfer of neurotoxic  
36 protein aggregates and damaged organelles to neighboring cells has also been demonstrated, potentially acting  
37 to ameliorate the deleterious effects in the originating neuron, but in turn such transfer may be deleterious to  
38 receiving cells [3]. How such transfer processes contribute to the etiology and pathology of neurodegenerative  
39 diseases such as Alzheimer's, Parkinson's, and Huntington's is an area of increasing investigation [3].

40

41 Recent studies indicate that wholesale ejection of aggregated protein and damaged organelles into extracellular  
42 vesicles represents another pathway to deal with toxic proteostress [4, 5]. Of particular interest are giant  
43 extracellular vesicles called exophers, with diameters rivaling that of the neuronal somata from which they bud,  
44 first discovered in *C. elegans* neurons under proteostress [4, 6]. Ejected exophers can carry aggregates and  
45 mitochondria out of the neuron, and the production of exophers is greatly stimulated under stress conditions that  
46 promote accumulation of misfolded protein [4, 7]. For example, exopher production is greatly increased by  
47 inhibition of proteasome and autophagy activity, increased osmotic strength, increased oxidative activity,  
48 nutrient deprivation, and forced expression of aggregating Huntingtin polyQ or mCherry proteins [4, 7]. In the  
49 case of Huntington HTT-Q128 protein expression, neurons that produced exophers maintained better neuronal  
50 function than those that did not, suggesting that exopher production is protective to neurons experiencing  
51 proteotoxic load [4]. Importantly, recent work indicates similar mechanisms operate in mammalian systems,  
52 with exophers reported to export oxidized mitochondria from highly active mouse cardiomyocytes [6], and

53 exopher-resembling giant vesicles identified in human and mouse brain, with an apparent increase in exopher  
54 number in diseased brain samples [8].

55  
56 The best studied system for analysis of neuronal exopher production remains the six *C. elegans*  
57 mechanosensory touch receptor neurons where exophers were discovered [4, 9]. These neurons are largely  
58 unipolar, each extending a long sensory neurite embedded in the hypodermis (skin) of the animal where each  
59 senses gentle touch to the animal body region within its receptive field, leading to a rapid retreat behavior when  
60 stimulated [10]. Of the six touch neurons in the hermaphrodite, the centrally located ALMR neuron produces  
61 exophers with the highest frequency and is the main model used in our studies [4, 7, 9]. Previous work showed  
62 that 10-20% of ALMR neurons stimulated by high level expression of mCherry produce an exopher [4, 9]. If an  
63 ALMR neuron produces an exopher, it generally only produces a single such vesicle in its lifetime, with most  
64 exophers produced on day 2 of adulthood [4, 9]. Very few exophers appear outside of the day 1 to day 3  
65 timeframe, which correlates with the high metabolic activity associated with reproduction, and an organismal  
66 switch in overall proteostatic stress response [11, 12]. Exophers in the ALMR neuron typically emerge from the  
67 neuronal soma in a polarized manner, formed from the plasma membrane opposite the large neurite [4, 9].  
68 Interestingly, as a budded exopher moves away from the soma it initially remains connected to the soma by a  
69 thin thread-like nanotube [4, 9]. Ultimately the connection to the soma is lost and the exopher is released. The  
70 exopher quickly breaks up into smaller vesicles that we refer to as “Starry Night” (SN) vesicles, which later  
71 disappear [4, 9] (Figure 1A).

72  
73 It is of critical importance to understand the fate of the exopher and the material it carries once released from  
74 the neuron. The *C. elegans* system offers the opportunity to understand this process in the native cellular  
75 context of the intact animal in which neurons are constantly interacting with neighboring cells. Here we show a  
76 key role for the closely associated hypodermis in phagocytosis and degradation of neuronal exopher contents.  
77 The acquisition of hypodermal phagosome maturation markers by the exopher-laden phagosome was low until  
78 phagosome fission into smaller starry night vesicles occurred, with lysosome activity required for the

79 degradation of starry night vesicle content after phagosomal fission. Importantly, our data also indicate a role  
30 for hypodermis-neuron interaction beyond simple exopher degradation, as the ability of the neuron to produce  
31 exophers appears to depend upon action of certain regulators in the hypodermis, including the GTPase ARF-6,  
32 its effector SEC-10/Exocyst, and the phagocytic receptor CED-1/Draper.

## 34 RESULTS

### 36 Exophers break up into smaller vesicles after release from the neuron

37 As previously described, exophers appear most frequently on adult day 2 (D2), with fewer appearing on adult  
38 day 1 (D1) or adult day 3 (D3), and very few appearing outside of this age range [4, 9]. To better understand the  
39 fate of exophers after they are produced, we first performed manual longitudinal tracking in individual animals  
40 focused on D1 or D2 exophers produced by the ALMR touch receptor neuron expressing a touch neuron-  
41 specific mCherry marker (Figure 1A). For these experiments we followed animals in their unperturbed and  
42 unrestrained culture plate environment using a high magnification epifluorescence dissecting microscope.

43  
44 We noted that the vast majority of mCherry-filled exophers convert into smaller “Starry Night” (SN) vesicles,  
45 and this always precedes the eventual loss of the neuronal exopher-derived mCherry signal (Figure 1A-C).  
46 Transient tubulation and rapid vesicle movement is a prominent feature of exopher vesiculation (Video 1).  
47 Exopher-derived small vesicles often appeared within the first two hours after exopher formation (D1 mean =  
48 2.0 hours (N = 32), D2 mean = 2.5 hours (N = 22)). Most exophers were eventually fully converted to starry  
49 night vesicles, with all detectable exopher-derived mCherry signal lost over the course of 3-4 days (D1 mean  
50 persistence = 80 hours (N = 24), D2 mean persistence = 98 hours (N = 14)). A minor fraction of exophers did  
51 not convert to starry night vesicles (7%, N=118). These exophers persisted and were never degraded over a 7-  
52 day tracking period, apparently failing to engage the hypodermal degradative machinery. Taken together our  
53 results suggest an obligatory transition from large exopher to smaller starry night vesicles prior to eventual  
54 degradation of exopher contents in the hypodermis.

15

## 16 **Neuronal exophers undergo phagocytosis by the hypodermis**

17 Large particles such as apoptotic bodies are engulfed and degraded by phagocytosis [13, 14]. Once a forming  
18 phagosome seals, the process of phagosome maturation begins, eventually leading to the degradation of the  
19 phagocytosed material. Phagocytic cups are characterized by polymerization of abundant F-actin that supports  
20 plasma membrane deformation to surround the target of engulfment. Phagosome maturation proceeds via  
21 sequential fusion of a sealed phagosome with endocytic compartments, generally beginning with early  
22 endosomes, then late endosomes, and finally lysosomes. Recycling of material not destined for degradation,  
23 such as phagocytic receptors, proceeds at the same time. To determine if mCherry-containing exophers undergo  
24 phagocytosis and phagosome maturation in the surrounding hypodermis, we expressed a variety of molecular  
25 markers with mNeonGreen tags from single copy transgenes using a hypodermis specific promoter (Phyp7)  
26 from the *semo-1/Y37A1B.5* gene [15].

17

18 We focused first on intact early stage exophers that had not started to break up into the smaller starry night  
19 vesicles. If the exopher is engulfed by the surrounding hypodermal cells via phagocytosis, we would expect  
20 hypodermal F-actin to surround the extruded exopher during the initial stage of exopher processing. To test this  
21 model, we expressed F-actin biosensor mNG::UtrCH, encoding an mNeonGreen fusion to the CH-domain of  
22 Utrophin [16], specifically in the hypodermis. We then quantified the F-actin signal at the periphery of newly  
23 formed exophers marked by mCherry (Figure 2A-B). As a control we performed the same analysis on the  
24 ALMR neuronal soma from which the exopher was derived, since the soma is also surrounded by the  
25 hypodermal Hyp7 cell [10]. We found that most exophers we examined were clearly coated in hypodermal F-  
26 actin (74% positive, N = 27), while the hypodermal membrane around the neuronal soma was not enriched in F-  
27 actin (Figure 2A-B). We also noted that most (65%, n = 45) intact exophers were surrounded by hypodermal  
28 puncta positive for mNG::PH(PLC $\delta$ ), a biosensor for the lipid PI(4,5)P<sub>2</sub>, with significantly more PI(4,5)P<sub>2</sub>  
29 signal overlap with the exopher periphery than the nearby neuronal soma periphery (Figure 2C-D) [17].  
30 PI(4,5)P<sub>2</sub> is typically enriched on the phagocytic cup, and is removed rapidly upon phagosome sealing [18].

31 Our quantitative imaging indicates that most intact exophers undergo phagocytosis by the neighboring  
32 hypodermal membrane (Figure 2A-D).

33  
34 We examined hypodermal actin association with exophers more closely in two ways. First, we divided exophers  
35 into three categories, early (stage 1), fully formed (stage 2), and exophers that had moved through the  
36 hypodermis to sites distant from the soma (stage 3) (Figure 1 – Figure Supplement 1). Exophers had a similar  
37 incidence of F-actin positivity in all stages; 71% stage 1 (N = 7), 78% stage 2 (N = 14), and 66% stage 3 (N = 6)  
38 exophers were F-actin positive. Second, we captured early budding events via time-lapse imaging, which is  
39 challenging since exopher events are rare and their time of occurrence is random within the first three days of  
40 adulthood. We were successful in capturing 6 exopher budding events via time-lapse imaging (Figure 2E, Video  
41 2). In 5/6 cases, hypodermal F-actin was not yet apparent when the neuronal bud first started to emerge, but in  
42 all cases F-actin was eventually acquired, indicating hypodermal recognition and engulfment.

43  
44 If actin polymerization is important for phagocytosis of exophers we would expect depletion of actin and/or the  
45 actin polymerization machinery to hinder degradation of exophers. Indeed, we found that depletion of  
46 hypodermal actin using tissue-specific RNAi against actins *act-1*, *act-2*, or *act-3*, resulted in accumulation of  
47 exophers derived from the ALMR neuron, suggesting a failure in hypodermal phagocytosis (Figure 2F).  
48 Hypodermis-specific depletion of *arx-2*, encoding the Arp2 subunit of the Arp2/3 complex required for  
49 formation of branched actin during phagocytosis [19], also resulted in the accumulation of exophers, and a  
50 reduction in starry night vesicles that derive from exopher degradation (Figure 2G). These experiments do not  
51 specify which actin isoforms are involved, as actin RNAi reactions are likely to cross react with one-another,  
52 and actin or arp2/3 perturbations are difficult to interpret in isolation, as they can affect many processes. Still,  
53 taken together, our data support the interpretation that a canonical actin-dependent hypodermal phagocytosis  
54 response is initiated in response to extruded exophers; hypodermis-specific disruption of actin and key actin  
55 regulator Arp2/3 results in a block in hypodermal digestion that processes ALM-derived exophers (Figure 2H).

56

57 Once phagocytosis is complete, we would expect hypodermal endosome and lysosome markers to accumulate  
58 on exopher-phagosomes as phagocyte organelles fuse with the phagosome to promote phagosome maturation  
59 and the degradation of its contents. We found that hypodermally-expressed mNeonGreen markers for distinct  
60 steps of phagosomal maturation label the periphery of intact ALMR neuron-derived exophers, but this labeling  
61 was weak, further supporting the interpretation that large exophers are usually associated with early stages of  
62 hypodermal phagocytosis (Figure 3A-H). In particular, we noted frequent weak labeling for early phagosome  
63 marker RAB-5 (42%, N = 29), late phagosome marker RAB-7 (70%, N = 24), and autophagosome marker  
64 LGG-1/LC3, suggesting that hypodermal early endosomes, late endosomes, and autophagosomes begin to  
65 associate with large phagocytosed exophers (Figure 3A-F). Low level association with the exopher phagosome  
66 periphery may indicate transitory endosome and autophagosome association rather than full fusion at this stage.  
67 Notably, however, early and late phagosome marker labeling, and autophagosome marker labeling, is much  
68 more pronounced later, after fragmentation of the exopher-laden phagosome (Figure 4A). We observed little  
69 acquisition of hypodermally expressed lysosome marker LMP-1/LAMP by intact exopher-phagosomes,  
70 suggesting little lysosome association at the large single phagosome exopher stage (Figure 3G-H).

### 72 **Starry Night vesicles represent maturing hypodermal phagosomes containing exopher-derived cargo**

73 As noted above, exopher-laden phagosomes begin to break up into smaller “starry night” vesicles about 2 hours  
74 after budding from a neuron. Phagosomes can break up into smaller vesicles during maturation, a process  
75 referred to as phagosome resolution [13, 14]. If these starry night vesicles represent a canonical phagosome  
76 resolution process we would expect colocalization with phagosome maturation markers but not markers for  
77 other organelles. To test this hypothesis we used confocal microscopy to measure percent colocalization of  
78 mCherry-labeled starry night vesicles with hypodermis-expressed markers for sequential steps of phagosome  
79 maturation, and other compartment markers. As expected for phagosomes, we found very little colocalization of  
80 starry night vesicles with Golgi marker AMAN-2 or basolateral recycling endosome marker RME-1 (Figure 4A,  
81 4B). In contrast, our quantitative imaging documented strong colocalization of starry night vesicles with  
82 hypodermally expressed 2XFYVE(HRS), a biosensor for the early phagosomal lipid PI(3)P; RAB-10, a



33 recycling regulator associated with early phagosomes and endosomes; and RAB-7, a marker of late phagosomes  
34 and endosomes (Figure 4A-B) [13, 20]. RAB-10 association was particularly pronounced and may indicate  
35 recruitment of a RAB-5 GAP to promote maturation via the Rab5/Rab7 transition, kinesin recruitment to  
36 promote fragmentation and movement, and/or active recycling of some components out of the vesicles at this  
37 stage [21-23]. We also found strong colocalization with LGG-1/LC3, a canonical marker of autophagosomes,  
38 recently found to contribute to phagosomal cargo degradation in *C. elegans* (Figure 4A-B) [24]. We conclude  
39 that starry night vesicles reflect exopher-laden early and late phagosomes that have undergone vesiculation, and  
40 suggest that markers found on starry night vesicles indicate a link between exopher phagosome resolution and  
41 phagosome maturation (Figure 4D) [13, 14].

42  
43 We also examined the ultrastructure of membranes near the ALMR neuron in specimens initially visually  
44 selected for recent mCherry positive ALMR exopher production. By electron microscopy we identified  
45 multilamellar vesicles within the hypodermis near the ALMR neuron. These vesicles appeared in exopher  
46 producing animals but not control animals, appearing similar to phagosome vesiculation products. The vesicles  
47 measured 200-500 nm in size, significantly smaller than the average extruded large vesicle exopher (~3 $\mu$ m).  
48 These results are consistent with a model in which Starry Night vesicles represent phagosomes undergoing  
49 resolution processing (Figure 4C).

### 50 **Exopher content degradation requires phagosome maturation and lysosomal activity**

51 Unexpectedly, we measured low colocalization of exopher-derived phagosomal vesicles in the hypodermis with  
52 lysosome marker LMP-1, whereas phagosome maturation should require lysosome fusion as a late step. We  
53 hypothesized that fusion of exopher-laden phagosomes with hypodermal lysosomes might rapidly degrade the  
54 neuron-derived mCherry found in exophers, making it difficult to capture instances of exopher-derived mCherry  
55 in late-stage phagolysosomes. To test this idea, we assayed the effects of a *cup-5*/mucolipin mutant, defective in  
56 lysosome function, on exopher and starry night. Consistent with this hypothesis, in *cup-5* mutants colocalization  
57 with the LMP-1 lysosome marker was greatly increased, the size of starry night vesicles was significantly  
58

larger, and the average fluorescence intensity of mCherry in starry night vesicles was significantly higher (Figure 5A-D). Our results suggest that most exopher-derived material taken up by the hypodermis from the neuron is degraded in hypodermal phagolysosomes, and that lysosome fusion is a late step in exopher processing. Lysosome function was not required for the transition from large exopher-containing phagosome into starry night phagosome fragments.

To better define the connection of exopher-phagosome maturation, fragmentation, and degradation, we also examined the effects of loss of *sand-1* using a temperature sensitive allele. SAND-1/Mon1 is part of a RAB-7 exchange factor complex required for RAB-5 to RAB-7 conversion during early to late phagosome maturation. Interestingly, we found that loss of *sand-1* caused a significant increase in the detection of intact exopher-laden phagosomes, along with loss of most smaller starry night fragmented phagosomes (Figure 5E-F). This processing-stalled phenotype was already apparent on day 1 of adulthood, and persisted at least through day 4 of adulthood, the time by which nearly all WT exopher-phagosomes have normally converted to starry night (Figure 5F). We conclude that conversion from a large exopher-laden phagosome to smaller starry night phagosomal fragments is important for cargo degradation, and that the molecular changes associated with early to late phagosome maturation, such as loss of RAB-5 and acquisition of GTP-bound RAB-7, are required for fragmentation into starry night vesicles.

To further probe requirements for phagosome fragmentation we tested *arl-8*, which encodes a small GTPase associated with lysosomes and endosomes that has been reported to affect phagosome or lysosome vesiculation by recruiting kinesins [25-27]. We found that *arl-8* hypomorphic mutants exhibit a defect in transitioning from large exopher-laden phagosomes to smaller starry night phagosomal vesicles. Although less pronounced than in *sand-1* mutants, perhaps due to residual ARL-8 activity, we measure a significant difference in persistence of large vesicle exophers at days 3-4 of adulthood in *arl-8* (Figure 5 – Figure Supplement 1). Because the ARL-8 GTPase is thought to recruit kinesins to endolysosomal compartments, our observations suggest a role for

34 cytoskeletal motors in exopher-laden phagosome vesiculation, and support a model that links vesiculation of  
35 exopher phagosomes to exopher content degradation.

### 37 **Hypodermal CNT-1 and RAB-35 are required for exopher maturation**

38 Given our observation of hypodermal PI(4,5)P<sub>2</sub> enrichment around early exophers (Figure 2C-D), we also  
39 analyzed the effects of mutants thought to influence PI(4,5)P<sub>2</sub> levels on phagosomes. ARF-GAP CNT-1 and  
40 small GTPase RAB-35 function in some cell corpse engulfment events [28, 29]. CNT-1 and RAB-35 have been  
41 proposed to act in the removal of PI(4,5)P<sub>2</sub> during phagosome maturation, via deactivation of another small  
42 GTPase, ARF-6, a known activator of PI-kinases [29]. Our own previous work showed a requirement in *C.*  
43 *elegans* for CNT-1 and ARF-6 in endosomal regulation in the intestinal epithelium [30]. Therefore, we tested  
44 *cnt-1*, *rab-35* and *arf-6* for roles in exopher-associated phagocytosis.

45  
46 We found that *cnt-1* and *rab-35* mutants accumulate large intact exophers, with higher levels of exophers  
47 present until at least day 4 of adulthood in *cnt-1* mutants, by which point nearly all WT exophers are normally  
48 consumed (Figure 6D, 6G-H; Figure 6 – Figure Supplement 1). Importantly, we find that hypodermis-specific  
49 expression of CNT-1::mNG or mNG::RAB-35, but not touch-neuron specific expression, rescued exopher and  
50 starry night numbers in their respective mutants (Figure 6H-I). This tissue-specific rescue indicates that CNT-1  
51 and RAB-35 function in the hypodermis for exopher clearance (Figure 6M). Hypodermis-specific mNG::RAB-  
52 35 could be clearly visualized labeling the periphery of large exophers (N = 12), but not around the neuronal  
53 soma, as predicted for a direct role in exopher clearance (Figure 6B). Hypodermis-specific CNT-1::GFP also  
54 often labeled exophers more than somas (N = 22), but was found in characteristic puncta at the exopher  
55 periphery rather than labeling the periphery smoothly like RAB-35 (Figure 6A). Taken together, our results  
56 support a direct role for RAB-35 and CNT-1 in regulating hypodermal phagosome formation during neuronal  
57 exopher processing.

### 59 **ARF-6 acts in the hypodermis to influence exopher production in the neuron**

50 Given the proposed role of CNT-1 and RAB-35 in ARF-6 down-regulation, we directly tested the role of ARF-6  
51 in exopher processing using a null allele *arf-6(tm1447)*, in which nearly the whole *arf-6* gene is deleted. In  
52 contrast to our results with *cnt-1* and *rab-35*, where exophers accumulate, we found a significant reduction in  
53 exopher numbers in *arf-6* mutants in ALMR neurons expressing mCherry or GFP (Figure 6D-E, 6J).  
54 Furthermore, *arf-6* mutants lacked most starry night, indicating that the loss of exophers was not due to an  
55 increased rate of hypodermal processing (Figure 6J). To confirm these results we used a *daf-2* mutant  
56 background to expand the dynamic range of our assay, since *daf-2* mutation greatly increases the basal level of  
57 exopher production [7]. This experiment confirmed a pronounced loss of exophers and starry night phagosomes  
58 in *arf-6* mutants (Figure 6K).

59  
60 To investigate the effect of *arf-6* deficiency in more detail, we captured timelapse video of neuronal somata,  
61 comparing *daf-2* mutants with *daf-2; arf-6* double mutants. Although we were not able to capture enough full  
62 exophergensis events, among more than 50 ~4-hr timelapse videos of each genotype, to analyze the effects of  
63 *arf-6* on exophergensis, we found similar rates of small bud production in both genotypes, suggesting that very  
64 early events in exophergensis in *arf-6* mutants occur at normal frequency (Figure 6 – Figure Supplement 4;  
65 Videos 3 and 4). Our results indicate that ARF-6 is important for exopher production, likely affecting small bud  
66 growth to form the large exopher bud, or to prevent regression of exopher buds once formed.

67  
68 Importantly, re-expression of *arf-6(+)* in just the hypodermis in the *arf-6(Δ)* background rescued exopher and  
69 starry night numbers (Figure 6J); and *arf-6* depletion via hypodermis-specific RNAi conferred the same  
70 reduction in exopher and starry night numbers as the *arf-6(Δ)* mutants (Figure 7A). Both lines of testing support  
71 the interpretation that ARF-6 activity in the hypodermis facilitates the successful production of exophers in the  
72 neuron. We also measured a higher level of hypodermal ARF-6::mNeonGreen puncta associated with the  
73 exopher periphery than around the neuronal soma, supporting the idea of a direct role for hypodermal ARF-6 in  
74 promoting neuronal exopher production (Figure 6C).

## ARF-6 functions downstream of RAB-35 and CNT-1

We further tested the relationship of ARF-6 to CNT-1 and RAB-35 via genetic epistasis. We found that the elevated number of exophers found in *cnt-1* and *rab-35* mutants was suppressed in *cnt-1;arf-6* and *rab-35;arf-6* double mutants (Figure 6G). This is consistent with RAB-35 and CNT-1 acting as negative regulators of ARF-6. Supporting this interpretation, we found that an *arf-6(ns388)* gain-of-function mutant[29] produced increased exopher numbers, similar to *rab-35* and *cnt-1* mutants, and the opposite of the *arf-6* loss-of-function mutants (Figure 6F).

Furthermore, we found that *rab-35* mutant exopher accumulation could be partly rescued by hypodermal CNT-1 overexpression, while *cnt-1* mutant exopher accumulation was not rescued by RAB-35 overexpression (Figure 6 – Figure Supplement 2). We also found greater association of ARF-6::mNeonGreen with exophers in *cnt-1* mutants than wild-type controls (Figure 6 – Figure Supplement 3). Taken together these results are consistent with a model in which RAB-35 upregulates CNT-1, and CNT-1 downregulates ARF-6 via ARF-GAP activity within the hypodermal cell (Figure 6M).

## SEC-10/Exocyst and PPK-1 PI-5 kinase may act with ARF-6

To identify relevant ARF-6 effectors participating in exopher production and phagocytosis, we performed hypodermis-specific RNAi knockdown of *C. elegans* homologs of known mammalian Arf6 effectors (Figure 7A-F). Among these, we found that only knockdown of *sec-10*, a component of the vesicle tethering complex Exocyst, produced an overall phenotype similar to *arf-6*, with significantly reduced exopher and starry night frequency (Figure 7D). Our data suggest that ARF-6 and SEC-10 function together in the hypodermis in a process required for the neuron to efficiently produce exophers. Given the nature of SEC-10 in vesicle tethering and fusion with the plasma membrane, and the proposed role of mammalian Arf6 in membrane delivery during phagocytosis [31], ARF-6 dependent delivery of membrane to the phagocytic cup via recycling vesicles may be the key process affected by SEC-10.

12 We found a different effect for hypodermal disruption of another candidate ARF-6 effector *ppk-1*, encoding a  
13 phosphatidylinositol 4-phosphate 5-kinase that can convert PI(4)P to PI(4,5)P<sub>2</sub> on the plasma membrane [32].  
14 Hypodermis-specific RNAi of *ppk-1* reduced starry night frequency, but did not reduce the number of exophers,  
15 which is different from *arf-6* and *sec-10* phenotypes (Figure 7B). We also noted that hypodermis-specific  
16 depletion of *ppk-1* produced higher than normal numbers of exophers remaining attached to the neuronal soma,  
17 and measured a similar defect in *arf-6* mutants for the few exophers that are produced without ARF-6 (Figure  
18 7G, 6L). Given these results, and data on PPK-1 homologs as Arf6 effectors in other organisms, we propose that  
19 PPK-1 participates in the exopher engulfment process downstream of ARF-6, but only in the later phase  
20 required for phagosome release (sealing), since *ppk-1* knockdown only phenocopies the later part of the *arf-6*  
21 mutant phenotype (Figure 7A, 7D, 6L). Our data may indicate dual roles for ARF-6, one early in exopher  
22 recognition/interaction by the hypodermis, and another role later in hypodermal phagosome completion.

#### 24 ***ced-1*, *ttr-52*, and *anoh-1* mutants, but not *ced-10* mutants, reduce exopher production**

25 As the reduction in exopher production found in *arf-6* mutants was surprising, we sought to compare these  
26 results with other mutants that might affect exopher phagocytosis by the hypodermis. To test this directly we  
27 analyzed effects of loss of the CED-1/DRAPER/MEGF10 phagocytic receptor, as well as CED-10/Rac, a  
28 master regulator of actin dynamics and membrane deformation during phagocytosis that acts in a parallel  
29 pathway to CED-1 [33]. CED-1 and CED-10 are well known for their roles in phagocytosis and degradation of  
30 apoptotic cell corpses in *C. elegans* and other organisms, but how such pathways would interact with exophers  
31 budding from living neurons was unclear. In the case of apoptotic cells, loss of CED-1 or CED-10 leads to an  
32 accumulation of cell corpses [34]. We found that *ced-1* mutants had significantly reduced exopher and starry  
33 night numbers, similar to the effects we observed in *arf-6* mutants and *sec-10* hypodermis-specific knockdown  
34 (Figure 8A). Furthermore, *ced-1* mutant exopher production was rescued by hypodermis-specific re-expression  
35 of CED-1, indicating a hypodermal focus for these CED-1 effects (Figure 8B).

37 CED-1 recognition of phagocytic targets usually depends upon surface exposure of phosphatidylserine (PS) and  
38 transthyretin-like protein TTR-52 that helps link the CED-1 extracellular domain to exposed PS on target cells  
39 [35]. ANOH-1, the *C. elegans* homolog of Ca<sup>2+</sup>-activated phospholipid scramblase TMEM16F, is required for  
40 PS-exposure and CED-1-mediated recognition of necrotic cells [36, 37]. We found that *ttr-52* and *anoh-1*  
41 mutants display strongly reduced levels of exopher production similar to *ced-1* mutants (Figure 8D). Taken  
42 together these results suggest that PS-exposure contributes to exopher recognition, and further suggests that a  
43 specific engulfing cell interaction with the neuron strongly influences the eventual production of the exopher  
44 itself.

45  
46 To better determine if the effects of CED-1 on exopher production might be via direct interaction of  
47 hypodermal CED-1 with the emerging exopher, we examined CED-1 protein association with exophers. In  
48 particular we used a hypodermis-specific, GFP-tagged, version of CED-1 that lacks C-terminal CED-1  
49 sequences, and increases the duration of CED-1/target associations that are normally otherwise quite transient  
50 [34]. Indeed, hypodermal CED-1 $\Delta$ C::GFP clearly labeled the periphery of exophers undergoing engulfment.  
51 The pattern of association of CED-1 $\Delta$ C::GFP with the exopher was striking in that CED-1 $\Delta$ C::GFP became  
52 enriched at sites of early exopher budding, but did not label the still attached neuronal soma (Figure 8C, Figure  
53 8 – Figure Supplement 1). Since the hypodermal CED-1 $\Delta$ C::GFP we used is constitutively expressed, we  
54 attribute the exopher surrounding CED-1 $\Delta$ C::GFP signal to CED-1 recruitment by exopher-surface signals.

55  
56 Our results with CED-10/Rac were quite different than CED-1, TTR-52, and ANOH-1. We found that *ced-10*  
57 mutants, and hypodermis-specific *ced-10* RNAi animals, accumulate exophers and display strongly reduced  
58 frequency of starry night vesicles (Figure 8E-F). These results indicate that hypodermal CED-10 does not affect  
59 neuronal exopher generation like CED-1, ARF-6, or SEC-10, but strongly affects completion of exopher  
60 phagocytosis, a prerequisite for phagosome fragmentation into starry night vesicles. We also found that  
61 hypodermis-specific mNeonGreen::CED-10 is enriched on the hypodermal membrane surrounding the exopher

52 compared to the hypodermal membrane surrounding the neuronal soma, suggesting a direct role for CED-10 in  
53 exopher-laden phagosome formation (Figure 8G).

54  
55 We conclude that the conserved CED-1/DRAPER phagocytic receptor plays a role in recognition and removal  
56 of neuronally derived exophers, and along with ARF-6 and SEC-10, supports activities in the hypodermis that  
57 greatly influence neuronal exopher production. Other phagocytic regulators, such as CED-10/Rac, do not appear  
58 important for such non-autonomous regulation of exophergensis, but are required to complete phagocytosis  
59 and remove the exopher once it has formed. Our results emphasize the existence of two classes of phagocytic  
60 regulators, those required to promote exopher production in the neuron, and those required only to execute  
61 phagocytosis.

## 62 63 **DISCUSSION**

64  
65 The exopher is a recently identified giant extracellular vesicle that has the capacity to carry large amounts of  
66 cargo out the neuron, especially under high stress conditions [4, 7]. Here we investigated the fate of mCherry-  
67 filled exophers released by the *C. elegans* ALMR touch neuron, finding that the surrounding hypodermis  
68 engulfs the exopher via defined phagocytosis steps, then processes the exopher-laden phagosome via  
69 phagosome maturation, ultimately leading to the degradation of most neuron-derived mCherry cargo in  
70 hypodermal phagolysosomes. The exopher response appears to be a mechanism to expel toxic cargo such as  
71 protein aggregates from the neuron, which is activated when other proteostasis pathways, such as the ubiquitin-  
72 proteasome and autophagy pathways, prove insufficient to the proteostatic load [4]. Exophergensis is likely to  
73 be especially important in cells such as neurons that cannot dilute accumulated toxins by cell division. Uptake  
74 of toxic or excess material by another cell provides a fresh chance to degrade components that the neuron-  
75 intrinsic pathways could not handle. In the case of the ALMR touch neuron in *C. elegans*, the hypodermal  
76 receiving cell Hyp7 is a very large syncytium formed by the fusion of many cells during development. Hyp7  
77 degradative capacity is expected to far outstrip that of the neuron expelling an exopher. The exopher, as a



38 phagocytic cargo, presents an unusual challenge in that it is often as large as an apoptotic cell, but remains  
39 attached to a living neuron during early stages of engulfment [4].  
40

### 41 **Neuronal exopher production requires phagocyte recognition.**

42 Our analysis revealed an unexpected relationship between hypodermis and neuron with respect to exopher  
43 production. Failure in exopher uptake by the hypodermis might have been expected to result in accumulation of  
44 unengulfed exophers, as occurs for apoptotic cell corpses if engulfment fails [33]. However, we found that  
45 fewer exophers are produced by neurons in *arf-6* and *ced-1* mutants, as both exopher and starry night vesicle  
46 accumulation is strongly reduced. ARF-6 and CED-1 are required in the hypodermis for this effect, as this  
47 phenotype is rescued by hypodermis-specific *arf-6* or *ced-1* re-expression, respectively. Moreover, hypodermis-  
48 specific RNAi of *arf-6* or its effector *sec-10* also reduce neuronal exopher production, strengthening the  
49 conclusion of hypodermal function required for neuronal exophergenesis. Interestingly, depletion of actin,  
50 Arp2/3, or loss of *ced-10/Rac* blocks at a later step, accumulating exophers, suggesting that an actin response by  
51 the hypodermis is not a key molecular requirement for neuronal exopher production. Further work will be  
52 required to understand the precise step in exophergenesis affected by hypodermal recognition. Since early bud  
53 frequency appears unaffected in *arf-6* mutants, hypodermal recognition is likely to be required for elaboration  
54 of the typical large exopher bud, and/or to prevent regression of exopher buds back into the soma prior to bud  
55 scission.

56  
57 CED-1, as a phagocytic receptor, is also expected to function in the phagocytic cell, and our CED-1 localization  
58 data suggest that hypodermal CED-1 distinguishes between exopher and the attached soma, exclusively  
59 associating with the exopher bud. The accumulation of hypodermal CED-1 around the exopher bud but not the  
60 neuronal soma, even at relatively early stages of exopher budding, reveals a likely asymmetry in surface  
61 membrane components between neuronal soma and exopher. It is interesting to note that mouse cardiomyocytes  
62 producing exophers maintain a dedicated pool of attached macrophages to accept produced exophers,  
63 suggesting that such close interplay between the exopher ejecting cell and the accepting phagocyte may be a

14 conserved feature of exopher production [6]. This kind of instructional relationship between phagocyte and  
15 neuron is also reminiscent of neuronal pruning by glial cells [38]. The transfer of expanded polyglutamine  
16 aggregates from neurons to associated glia in *Drosophila* further suggests a mechanistic kinship [39]. Our  
17 results with *ttr-52* and *anoh-1* suggest that presentation of phosphatidylserine on the exopher surface contributes  
18 to specific exopher recognition, especially given the known role of CED-1 in phosphatidylserine recognition.  
19 Further work will be required to fully understand how an exopher producing cell senses and responds to the  
20 associated phagocyte.

### 21 22 **Exopher production may be neuroprotective**

23 The removal of exopher contents from the neuron by the phagocytosis are likely to be neuroprotective. Previous  
24 work showed that gentle touch response is better preserved in a HttQ128::CFP background when touch neurons  
25 had produced an exopher as compared to animals in which the touch neurons had not produced an exopher [4].  
26 To extend this analysis, we performed a similar analysis in *arf-6* and *ced-1* mutants in animals expressing  
27 mCherry in the touch neurons, comparing gentle touch response to mCherry controls. For both *arf-6* and *ced-1*  
28 mutants, we found reduced response to gentle touch in 10-day old adults (Ad10), but not 5-day old adults  
29 (Ad5), indicating a deficit in old age neuronal function in mutants in which exopher maturation is compromised  
30 (Figure 8 – Figure Supplement 2). These results are consistent with a neuroprotective role for exopher  
31 production, but caveats remain to this interpretation, as neither ARF-6 nor CED-1 are specific to  
32 exophergogenesis and may affect neuronal aging in other ways.

### 33 34 **Phagosome maturation is required for the hypodermal processing of neuronal exopher material.**

35 A number of trafficking mutants, including *rab-35* and *cnt-1*, allowed full exopher production, but blocked  
36 phagosome completion. RAB-35 and CNT-1 have been proposed to be negative regulators of the small GTPase  
37 ARF-6, with downregulation of ARF-6 important for the completion of phagocytosis [29]. Downregulation of  
38 ARF-6 may be required to control relative PI(4,5)P2 and PI(3)P levels, with the proper mix of such lipids  
39 required to recruit/activate fission factors such as LST-4/Snx9 and DYN-1/dynamamin that complete phagosomal

10 sealing [40-42]. Especially high levels of force from outside the neuron may be required to complete exopher  
11 phagocytosis if the neuron does not fully sever the soma-exopher connection from the inside, as might be  
12 implied by the long nanotube-like connector frequently observed between the neuronal soma and exopher [4]. A  
13 requirement for external forces provided by the phagocyte was recently proposed for severing large lobes  
14 produced by *C. elegans* primordial germ cells [43].

15  
16 Consistent with ARF-6 regulation by RAB-35 and CNT-1, *rab-35* and *cnt-1* mutants display the opposite  
17 phenotype to the *arf-6* loss-of-function mutant, accumulating rather than lacking exophers, and display an  
18 epistasis relationship suggesting that RAB-35 positively regulates CNT-1, and CNT-1 downregulates ARF-6  
19 [29, 44-46]. Indeed, an *arf-6* gain-of-function mutant phenocopies *rab-35* and *cnt-1* mutants. *rab-35* and *cnt-1*  
20 mutant exopher accumulation was rescued by hypodermis- but not neuron-specific expression, further  
21 indicating that the relevant action of ARF-6 is in the hypodermis, even though it is likely that ARF-6 is  
22 expressed in all cells. Subcellular localization results with these proteins was surprising, however; while RAB-  
23 35 smoothly labeled the engulfed exopher periphery, CNT-1 and ARF-6 were only visualized as puncta  
24 resembling endosomes at the phagosome periphery. Such subcellular distribution could indicate that RAB-35  
25 functions directly on the phagosome, while ARF-6 and CNT-1 could function via endosomal transport or  
26 membrane contact rather than assembling directly on the phagosomal membrane.

27  
28 There are some noteworthy mechanistic differences between exopher phagocytosis and other *C. elegans*  
29 phagocytosis events involving RAB-35 and/or CNT-1. First, in the RAB-35/CNT-1 dependent phagocytosis of  
30 the *C. elegans* male linker cell, *arf-6* null mutants were epistatic to *rab-35/cnt-1* mutants as we observed,  
31 restoring efficient linker cell phagocytosis and degradation [29]. However, the *arf-6* single mutant had no effect  
32 on linker cell corpse production or disposal, unlike the strong effects *arf-6* mutants have on exopher production.  
33 Linker cell phagocytosis was also CED-1 independent, unlike the exopher case [29]. The strong effects of ARF-  
34 6 and CED-1 single mutants on the exopher system indicate clear mechanistic differences from the linker cell  
35 example. One possibility is that ARF-6 and SEC-10/exocyst control CED-1 recycling required for early exopher

56 recognition by the hypodermis. ARF-6 may then also contribute to later steps in phagocytosis, as hypodermis-  
57 specific depletion of another candidate ARF-6 effector, PPK-1, does not affect exopher production but inhibits  
58 the transition from engulfed exopher to exopher-laden phagosome fragments, which is likely required prior  
59 phagosomal sealing. We also found that exophers that did form in *arf-6* mutants were more likely than normal  
60 to remain soma-attached, similar to our findings after hypodermal *ppk-1* depletion, supporting an additional  
61 later role for ARF-6 with PPK-1.

62  
63 The apparent obligatory progression from exopher-laden phagosome to “starry night” phagosomal  
64 fragmentation prior to degradation of phagosomal content resembles recently described phagosomal resolution  
65 processes in the *C. elegans* embryo and in mammalian macrophages [14, 25, 26, 47]. We found that SAND-  
66 1/Mon1 was required for exopher-containing phagosome fragmentation. Given the role of SAND-1 as a subunit  
67 of the key RAB-7 GDP/GTP exchange factor during phagosome maturation, our results imply an essential role  
68 for RAB-7 and its effectors in this process [48-50]. Recent work in mammalian macrophages indicates a role for  
69 Rab7-effector and lipid transfer protein ORPL1 in tethering phagosomal microdomains to the ER in concert  
70 with ER localized VAP, acting to reduce PI4P levels and potentially acting as an anchor for the phagosome as  
71 pulling forces draw out recycling tubules from the limiting membrane [26]. It will be of great interest to  
72 determine if such ER tethering is relevant to exopher-laden phagosome resolution and if failure in this process  
73 can explain our results with *sand-1* mutants. Furthermore, we identified a requirement for ARL-8 in exopher-  
74 laden phagosome resolution, suggesting a role for kinesin-type motor activity as a driving force in exopher-  
75 phagosome tubulation and fragmentation [14, 25]. We also note extensive acquisition of hypodermal LGG-  
76 1/LC3 by fragmented, but not whole exopher-laden phagosomes, suggesting either LC3-associated  
77 phagocytosis, or fusion of exopher-phagosome fragments with autophagosomes, which may support later  
78 content degradation [24]. We favor a full autophagosome fusion model, since we did not observe LGG-1  
79 association with intact phagosomes as would be expected for LC3-associated phagocytosis. Interestingly, we  
80 also did not observe lysosome (LMP-1) marker acquisition on unfragmented phagosomes, which suggests a

different order of events from that described in macrophages, where lysosome fusion to phagosomes precedes fragmentation [26].

Taken together our results identify a set of conserved phagosome resolution mechanisms that operate to break down the large phagosomes containing neuronal exophers, with implications for the ultimate fate of engulfed material, including toxic aggregates. It remains to be determined to what extent neuronally derived toxic materials can escape the hypodermal lysosomal system to reach the cytoplasm, or to be re-secreted to reach additional nearby cells, an important avenue for future analysis. Still, conserved roles for *C. elegans* phagocytosis receptor CED-1, and *Drosophila* counterpart Draper [39, 51], in the efficient extrusion of disease aggregates underscores the potential importance of related mammalian MEGF10-dependent mechanisms in human pathological aggregate spread [52, 53], and invites a new focus on requirements in glial phagocytosis partners in promoting, or clinically addressing, neuropathology.

## MATERIALS AND METHODS

### Plasmids and Strains

All *C. elegans* strains were derived originally from the wild-type Bristol strain N2. Worm cultures, genetic crosses, and other *C. elegans* husbandry were performed according to standard methods [54]. Mutants used in this study: *anoh-1(tm4762)*[36], *arf-6(tm1447)*[45], *arl-8(wy271)*[55], *ced-1(e1735)*[34], *ced-10(n3246)*[56], *cnt-1(tm2313)*[45], *cup-5(ar465)*[57], *daf-2(e1370)*[58], *rab-35(b1034)*[30], *ttr-52(tm2078)*[35], *sid-1(qt9)*[59]. A complete list of strains used in this study is provided in Supplementary File 1.

*C. elegans* expression plasmids utilized the Phyp-7 promoter from the *semo-1* gene for hypodermal expression, or the Pmec-7 promoter from the *mec-7* gene for touch neuron expression [15, 60, 61]. Vector details are available upon request. Most cloning was performed using the Gateway *in vitro* recombination system

17 (Invitrogen, Carlsbad, CA) using in house modified versions of hygromycin-resistant and MiniMos enabled  
18 vector pCFJ1662 (gift of Erik Jorgensen, University of Utah, Addgene #51482): pCFJ1662 Phyp7 mNeonGreen  
19 GTWY let858 (34B2), pCFJ1662 Phyp7 GTWY mNeonGreen let858 (34H4), pCFJ1662 Phyp7 GTWY oxGFP  
20 let858 (35G7), or pCFJ1662 Pmec7 mNeonGreen GTWY let858 (34D4). pDONR221 entry vectors containing  
21 coding regions for *lgg-1*, *rab-5*, *rab-7*, *lmp-1*, *rme-1*, *aman-2*, *arf-6*, *cnt-1*, *rab-35*, *ced-10*, *2X-FYVE(HRS)*, and  
22 *PH-PLC $\delta$*  were transferred into hypodermal or neuronal destination vectors by Gateway LR clonase II reaction  
23 to generate C-/N- terminal fusions. Single-copy integrations were obtained by MiniMOS technology [62]. The  
24 Phyp-7 CED-1 $\Delta$ C::GFP let-858 plasmid was constructed by amplifying the Phyp-7/*semo-1* promoter from  
25 pPD49.26-Phyp-7-sfGFP-Gal3 (gift of Xiaochen Wang, Institute of Biophysics, Chinese Academy of Science)  
26 and the *ced-1 $\Delta$ C* minigene from pZZ645 (gift of Zheng Zhou, Baylor College of Medicine) and inserting into  
27 SacII + AgeI digested plasmid pCFJ1662 Pdpi-7 GTWY GFP let858 (30D1), replacing the Pdpi-7 and GTWY  
28 segments, using the NEBuilder Gibson assembly kit (New England Biolabs). Phyp7 CED-1(+):GFP let-858  
29 plasmid (43F6) was constructed by amplifying the *ced-1* minigene from pZZ610 (gift of Zheng Zhou, Baylor  
30 College of Medicine) and inserting into BstEII-HF + NgoMIV digested plasmid pCFJ1662 Phyp7 GTWY  
31 oxGFP let858 (35G7), replacing the GTWY segment, using the NEBuilder Gibson assembly kit (New England  
32 Biolabs).

### 34 **Longitudinal Exopher tracking**

35 L4 animals expressing touch neuron-specific mCherry (strain ZB5033) were picked onto a seeded 4-cm NGM  
36 plate the day before experiment start. ALMRs of free-moving adult D1 or D2 animals were screened at 100-  
37 150x on a Kramer FBS10 fluorescent dissecting microscope. Each ALMR exopher-positive animal was picked  
38 onto its own individual 35-mm plate and labeled with time of identification, and a sketch of exopher and soma,  
39 and descriptions of any exopher vesiculation recorded. Concurrently, exopher-negative animals were transferred  
40 to their own 35-mm plates, timestamped and labeled, eventually matching either the total number of exopher-  
41 positive animals or 20, whichever was higher. Exopher-negative animals that were not singled out were  
42 redistributed to 2 fresh 4-cm “communal” plates. All exopher-positive plates were revisited every 30 minutes–1

hour. Rechecks were timestamped and any significant changes in exopher appearance or position, particularly onset of SN or exopher fragmentation, were sketched and described. Exopher-negative animals on the communal plates were also rescreened at least once, with each animal being transferred to one of two new 35-mm communal plates. To reduce fluorescence exposure time, initial and subsequent checks were limited to  $\leq 5$  seconds illumination each. D1 and D2 animals that still had intact exophers were rechecked at least 3 more times. D3: Animals were rechecked and singled out as described for D2, except no new exopher-negative 35-mm plates were prepared. Starting D3, all animals would be transferred to a new 35-mm or 4-cm plate every other day. D4, D5: Animals were assessed as described for D3. D6–D16: All plates assessed as in D4, except only once per day.

### **Exopher and starry night counting**

For exopher and starry night frequency measurements, each trial consisted of 50 L4 animals singled onto a standard OP50 seeded NGM plate. Most experiments were scored on adult day 2, unless otherwise noted. Animals were scored on a Kramer FBS10 fluorescent dissecting microscope after anesthesia via addition of 10ul of 5mM levamisole. We scored ALMR neurons for exopher or starry night events in a binary (yes/no) manner. Because exopher and starry night counts are binary, ANOVA and t-tests are inappropriate for statistical evaluation. We used the Cochran-Mantel Haenszel (CMH) test to determine p-values.

Exopher identity was based upon size relative to the neuronal soma, with neuron-derived object larger than  $\frac{1}{4}$  soma (3–5  $\mu\text{m}$ ) for positive identification. Early vesiculation was characterized the presence of smaller mCherry puncta localized around the exopher, with the exopher still  $\frac{1}{4}$  soma sized or larger. Starry night was characterized by abundant mCherry puncta appeared near the neuronal soma, often with spread further along the animal. Details on exopher recognition have been published in reference [9].

### **Confocal microscopy and image analysis**

58 Live animals were mounted on slides using 5% agarose pads and 10 mM levamisole. Multi-wavelength  
59 fluorescence images were obtained using a spinning-disk confocal imaging system: Zeiss Axiovert Z1  
70 microscope equipped with X-Light V2 Spinning Disk Confocal Unit (CrestOptics), 7-line LDI Laser Launch  
71 (89 North), Prime 95B Scientific CMOS camera (Photometrics) and oil-immersion objectives (40X, 63X, and  
72 100X). Fluorescence images were captured using Metamorph 7.7 software. Z series of optical sections were  
73 acquired using a 0.2 $\mu$ m or 0.5 $\mu$ m step size.

74  
75 The “Integrated Morphometry Analysis” function of Metamorph was used to detect the fluorescent structures  
76 that are significantly brighter than the background and to measure total puncta number (referred as “structure  
77 count”) and total fluorescence area (referred as “total area”) within unit regions. mNeonGreen and mCherry-  
78 tagged protein colocalization analysis was performed using the “Measure colocalization” Application within the  
79 Metamorph software. After thresholding, the percentage of green fluorescence area (area A) overlapping with  
80 red fluorescence area (area B) in starry night regions was analyzed for each genotype. Colocalization  
81 experiments were performed on day 2 adults. The “4D viewer” function of Metamorph was used to detect the  
82 overlap of hypodermal expressed mNeonGreen markers and neuronal mCherry-labeled intact exophers. After  
83 thresholding, we analyzed images for colocalization observing Z-stacks laterally in 3D projection for 3-  
84 dimensional observation.

### 85 86 **Timelapse analysis**

87 Time-lapse movies were acquired on a spinning-disk confocal microscope using 40X and 63X objectives. For  
88 Videos 1 and 2, Day 2 adults were immobilized by adding 10 $\mu$ l of 5mM levamisole to the coverslip before it  
89 was placed over the 5% agarose pads. The software was used to mark the stage position for 10 animal’s ALMR  
90 neuron. Z-stacks were spaced at 0.2 $\mu$ m. For time-lapse imaging, 30 Z-stacks were acquired every 5 to 10  
91 minutes for 2 hours. Data were then inspected using “Review Multi-Dimensional Data” function to select the  
92 optimal plane at each timepoint. The selected sequential planes were then compiled into a AVI file using the  
93 “Make movie” function in Metamorph, with each frame displayed for 1/30th of a second. For Figure 6 – Figure



Supplement 4 and Videos 3 and 4, animals were grown at 15°C until the L4 stage, then moved to 20°C for one day to reach adult day 1 before scoring. We focused on ALM neurons with no existing exopher bud morphology. Neurons in ZB4857 and RT4231 strains were imaged on average every 4 minutes for ~ 4 hours. For this analysis minimum bud size to be counted was one tenth the size of source soma.

### **Electron microscopy**

We prepared D2 hand-picked exopher-positive animals expressing mCherry in the touch neurons for TEM analysis by high pressure freezing and freeze substitution (HPF/FS)[63]. After HPF in a Baltec HPM-010, we exposed animals to 1% osmium tetroxide, 0.1% uranyl acetate in acetone with 2% water added, held at -90°C for 4 days before slowly warming back to -60°C, -30°C, and 0°C, over a 2 day period. We rinsed the samples several times in cold acetone and embedded the samples into a plastic resin before curing them at high temperatures for 1–2 days. We collected serial thin sections on plastic-coated slot grids and post-stained them with 2% uranyl acetate and then with 1:10 Reynold's lead citrate, and examined with a JEOL JEM-1400 Plus electron microscope with Gatan Orius SC100 bottom mount digital camera. By observing transverse sections for landmarks such as the 2nd bulb of the pharynx, it was possible to reach the vicinity of the ALM soma before collecting about 1,500 serial thin transverse sections, or lengthwise sections for landmarks such as the cuticle before collecting about 1,000 serial lengthwise thin sections.

### **RNA-mediated interference screening**

Hypodermis-specific feeding RNAi was performed in strain ZB4690 by standard methods using HT115 bacteria carrying dsRNA expression plasmid L4440, with or without gene targeting sequences in between the two flanking T7 promoters. We used NGM growth plates supplemented with tetracycline and carbenicillin to select for the L4440 RNAi plasmids, and IPTG (Isopropyl β-D-1-thiogalactopyranoside) to induce dsRNA expression. For *act-1*, *act-2* and *act-3*, scored animals were exposed to RNAi food from L4 to adult day 2. Exposure during earlier developmental stages was lethal. *arx-2* animals were exposed to RNAi food from L1 to adult day 2 before scoring. Scoring the next generation was not possible due to embryonic lethality. For maximum effective

knockdown in the ARF-6 effector screen, we scored animals after two full generations of growth on RNAi food. In a typical experiment 10 adult hermaphrodites were transferred to fresh RNAi plates, allowed to lay eggs for 3 hr, after which the parents were removed. Once the eggs hatched and reached adulthood, 10 adults were again transferred to fresh RNAi plates, allowed to lay eggs and then removed. Once these eggs hatched and reached L4 stage, 50 animals per trial were transferred again to fresh RNAi plates and scored as Day 2 adults. RNAi feeding constructs were obtained from the Ahringer library except for *arf-6*, *ced-10*, and *unc-16*, in which cDNA sequences were cloned into SacI + HindIII digested L4440 vector after PCR from total N2 cDNA, then re-transformed into HT115 *E. coli* [64, 65].

### **Touch Sensitivity Assay**

To assay for touch sensitivity, age synchronized adults were stroked with a single eyelash hair on alternating anterior and posterior halves of the body. Reversal was an indication of a positive touch response to anterior stimulation. Animals responding to 3 of 5 touches were scored as sensitive, animals responding to 2 or fewer touches were scored as insensitive. Synchronized animals were tested on adult day 5 and 10. 3 biological replicates of 30 animals/replicate were performed.

### **Statistical analysis**

ALMR exopher occurrence was scored as yes or no (binary), with each trial graphed as a percentage of total. For this type of data we used Cochran-Mandel Hansel analysis for P-value calculation of at least 3 or more biological trials. For hypodermal expressed marker measurements, we used two-tailed t-tests. Data were considered statistically different at  $P < 0.05$ .  $P < 0.05$  is indicated with single asterisks,  $P < 0.001$  with double asterisks, and  $P < 0.0001$  with triple asterisks.

### **Materials and Data Availability**

All materials and resources described in this article are available upon request with no restrictions. All data generated or analyzed during this study are included in the manuscript and supporting files.

16

## 17 **ACKNOWLEDGMENTS**

18 We thank members of the Grant and Driscoll labs for discussion of data and manuscript feedback. We thank  
19 Helen Ushakov for expert microinjection. We thank Zheng Zhou, Erik Jorgensen, Kang Shen, Shai Shaham,  
20 Martin Chalfie, and Xiaochen Wang for plasmids and strains. This work was supported by NIH grant  
21 R01AG047101 to M.D., B.D.G., and D.H.H., NIH grant R24OD090143 to D.H.H., NIH grant F31AG066405  
22 to M.L.A., NIH grant F31NS101969 to A.J.S.. Some strains were provided by the CGC, which is funded by the  
23 NIH Office of Research Infrastructure Programs (P40 OD010440).

24

25

## 26 **FIGURE LEGENDS**

27

28 **Figure. 1 Longitudinal analysis indicates that exophers vesiculate prior to degradation of exopher-**  
29 **derived cargo.**

30 **A)** Sequential images captured on a fluorescence dissecting microscope are shown for the same animal at  
31 different timepoints. The six touch receptor neurons are marked by mCherry expression. Images focus on the  
32 ALMR neuron near the center of the body. The images show exopher production (A'), followed by exopher  
33 vesiculation (A''), and finally loss of exopher-derived mCherry signal (A'''). Abbreviations: ALMR = anterior  
34 lateral microtubule neuron right, ALML = anterior lateral microtubule neuron left, AVM = anterior ventral  
35 microtubule neuron, PVM = posterior ventral microtubule neuron. PLM = posterior lateral microtubule neuron. **B)**  
36 Time from exopher identification to first observation of exopher vesiculation is graphed. Each data point  
37 represents an individual tracked animal. Data from adult Day 1 (D1) exophers and adult Day 2 (D2) exophers  
38 are graphed separately. SN = starry night **C)** Time from the start of exopher vesiculation to the observed loss of  
39 exopher-derived mCherry signal is graphed. Each data point represents an individual tracked animal. Data from  
40 adult Day 1 (D1) exophers and adult Day 2 (D2) exophers are graphed separately. Scale bar = 50 $\mu$ m.

41

72 **Figure 1—source data 1. Numerical data for Figure 1.**

73  
74 **Figure 1 – Figure Supplement 1. Three exopher zones.** Diagram depicting three zones used to divide  
75 exophers into three categories, early (stage 1) within one soma length, fully formed (stage 2) within two soma  
76 lengths, and exophers that had moved through the hypodermis to sites distant from the soma (stage 3).

77  
78 **Figure 2. Neuronal exophers are phagocytosed by the adjacent hypodermis in an F-actin dependent**  
79 **manner.**

80 **A, C)** Confocal fluorescence micrographs are shown for an mCherry labeled ALMR neuron-derived exopher, or  
81 the similar-sized mCherry labeled ALMR neuronal soma from the same neuron. Surrounding hypodermis-  
82 specific expression of UtrCH::mNeonGreen (an F-actin biosensor) and PH(PLC $\delta$ ):mNeonGreen (a biosensor  
83 for the lipid PI(4,5)P<sub>2</sub>) expressed from the hypodermis-specific *semo-1* promoter are shown. A merged image,  
84 and a merged 3-D projection, are shown for each example. Scale bar, 5  $\mu$ m. **B, D)** As a measure of  
85 hypodermal marker recruitment to the exopher, we measured the volume of overlapping signal in 3-D  
86 projections between the hypodermal marker and ALMR-neuron derived exopher, comparing to the ALMR  
87 neuronal soma as a control, \*P < 0.05 by two-tailed unpaired *t*-test. N = 24 (F-actin) and N = 18 (PI(4,5)P<sub>2</sub>). **E)**  
88 Time-lapse images of hypodermal F-actin dynamics during the engulfment of the exopher. ‘0 min’ indicates the  
89 beginning of observed time course. Scale bar, 5  $\mu$ m. **F)** Histogram depicting percentage of exopher positive  
90 animals upon hypodermal-specific RNAi for empty vector control (L4440), *act-1*, *act-2* or *act-3* in Day 2  
91 adults. \*\*\*\*P < 0.0001, \*P < 0.05 calculated using the Cochran-Mantel Haenszel (CMH) test. Each point  
92 represents a trial of n=50 animals scored, with 4 trials per condition. **G)** Histogram depicting exopher and starry  
93 night positive animal frequency after hypodermal specific RNAi for empty vector (EV) control, or *arx-2*  
94 (ARP2/3 subunit) in Day 3 adults. \*\*\*\* P < 0.0001, \*P < 0.05 calculated using the Cochran-Mantel Haenszel  
95 (CMH) test. Each point represent a trial of N = 50 animals scored, with 6 trials per condition. **H)** Diagram  
96 summarizing interpretation of events, including branched actin dependent engulfment of ALMR-neuron  
97 exophers by the hypodermis, a prerequisite for later vesiculation of the completed phagosome.

08  
09 **Figure 2—source data 1. Numerical data for Figure 2.**

10  
11 **Figure 3. Hypodermal endosomes and autophagosomes, but not lysosomes, begin recruitment prior to**  
12 **exopher-laden phagosomes vesiculation.**

13 **A, C, E, G)** Fluorescence micrographs are shown for an mCherry-labeled ALMR neuron-derived exopher, or  
14 the similarly sized mCherry labeled ALMR neuronal soma from the same neuron. Surrounding hypodermis  
15 specific expression of **(A)** mNeonGreen::*RAB-5* (an early endosome marker), **(C)** mNeonGreen::*RAB-7* (a late  
16 endosome marker), **(E)** mNeonGreen::*LGG-1/LC3* (an autophagosome marker), and **(G)** *LMP-1::mNeonGreen*  
17 (a lysosome marker), driven by the hypodermis-specific *semo-1* promoter, are shown. A merged image, and a  
18 merged 3-D projection, are shown for each example. Scale bar, 5  $\mu\text{m}$ . **B, D, F, H)** As a measure of  
19 hypodermal marker recruitment to the exopher, we measured the volume of overlapping signal between the  
20 hypodermal marker and ALMR-neuron derived exopher, comparing to the ALMR neuronal soma as a control,  
21 \* $P < 0.05$  by two-tailed unpaired *t*-test.  $N = 13$  (*LGG-1*),  $N = 20$  (*RAB-5*),  $N = 12$  (*RAB-7*),  $N = 21$  (*LMP-1*).

22  
23 **Figure 3—source data 1. Numerical data for Figure 3.**

24  
25 **Figure 4. Starry Night vesicles are exopher-phagosome vesiculation products that further fuse with**  
26 **hypodermal endosomes.**

27 **A)** Fluorescence micrographs show ALMR-exopher-derived mCherry labeling exopher-laden phagosome  
28 vesiculation products. Hypodermis-specific expression of *AMAN-2::mNeonGreen* (a Golgi marker),  
29 *mNeonGreen::RME-1* (a recycling endosome marker), *mNeonGreen::2XFYVE* (an early endosome/phagosome  
30 marker and PI(3)P biosensor), *mNeonGreen::RAB-10* (an early phagosome/endosome marker and recycling  
31 regulator), *mNeonGreen::RAB-7* (a late endosome/phagosome marker), *LMP-1::mNeonGreen* (a lysosome  
32 marker), and *mNeonGreen::LGG-1/LC3* (an autophagosome marker), each driven by the hypodermis-specific  
33 *semo-1* promoter, are shown. Scale bar, 5  $\mu\text{m}$ . **B)** Graph quantifying colocalization of each marker with Starry

24 Night exopher-phagosome vesiculation products. AMAN-2, N = 22; RME-1, N = 20; 2XFYVE; N = 28; RAB-  
25 10, N = 30; RAB-7, N = 21; LMP-1 N = 17; LGG-1, N = 22. **C)** Thin section electron micrograph showing  
26 candidate phagosome-derived vesicles (arrows) within the hypodermis near the ALMR soma. **D)** Diagram  
27 summarizing interpretation of events, including early endosome, late endosome, and autophagosome fusion  
28 with exopher-laden phagosome vesiculation products.

29  
30 **Figure 4—source data 4. Numerical data for Figure 4.**

31  
32 **Figure 5. Lysosome function is required for the end-stage degradation of phagocytosed exopher cargo.**

33 **A)** Fluorescence micrographs show ALMR-exopher-derived mCherry labeling exopher-phagosome vesiculation  
34 products (Starry Night) in red, with hypodermis specific expression of LMP-1::mNeonGreen (a lysosome  
35 marker) shown in green. Wild-type and *cup-5(ar465)* mutant images are shown. Arrows indicate LMP-1:mNG  
36 that colocalized with neuron-derived mCherry vesicles. Scale bar, 5  $\mu$ m. **B)** Histogram quantifying  
37 colocalization of the LMP-1 lysosome marker with ALMR-exopher-derived vesicles in wild-type and *cup-5*  
38 mutant. **C)** Histogram quantifying average the size of ALMR-exopher-derived vesicles in wild-type and *cup-5*  
39 mutant. **D)** Histogram quantifying average the florescence intensity of mCherry signal in ALMR-exopher-  
40 derived vesicles in wild-type and *cup-5* mutant. **(B-D)** N = 17 (wild-type), N = 20 (*cup-5(ar465)*) \*\*\*\* P <  
41 0.0001, \*\*P < 0.01 by two-tailed unpaired t-test. **E)** Histogram quantifying exopher and starry night numbers in  
42 wild-type and *sand-1(or552)* mutant \*\*\*\* P < 0.0001, \*P < 0.05 by the Cochran-Mantel Haenszel (CMH) test,  
43 N = 50 per trial over 3 trials. **F)** Line Graph quantifying exopher numbers at different days of adulthood in wild-  
44 type and *sand-1(or552)* mutant. N = 50 per trial over 3 trials.

45  
46 **Figure 5—source data 1. Numerical data for Figure 5.**

47  
48 **Figure 5 – Figure Supplement 1. ARL-8 promotes the vesiculation of exophers-laden phagosomes. A)**

49 Histogram depicting the frequency ratio of animals displaying Day 3 Starry Night vesicles to those positive for

50 intact exopher-phagosomes on Day 2, comparing wild-type and *arl-8(wy271)* hypomorphic mutants. A reduced  
51 ratio suggests delayed vesiculation. \*\* $p < 0.01$  by two-tailed unpaired *t*-test,  $n=10$  over 3 trials. **B)** Line Graph  
52 showing exopher numbers on different days of adulthood in wild-type and *arl-8* mutant. \*\*\*\* $p < 0.0001$ ,  
53 \*\*\* $p < 0.001$ , \* $p < 0.05$  by the Cochran-Mantel Haenszel (CMH) test,  $n=50$  over 3 trials.

54  
55 **Figure 5 – Figure Supplement 1—source data 1. Numerical data for Figure 5 – Figure Supplement 1.**

56  
57 **Figure 6. Hypodermal ARF-6 influences neuronal exopher production and interacts with CNT-1 and**  
58 **RAB-35 to complete hypodermal phagocytosis.**

59 **A-C)** Fluorescence micrographs showing hypodermally expressed CNT-1/ARF-GAP, GTPase RAB-35, and  
60 GTPase ARF-6 associated with the periphery of intact exophers. Histograms indicate overlapping volume of  
61 hypodermal marker with exopher and neuronal soma periphery, \*\* $P < 0.01$  by two-tailed unpaired *t*-test. CNT-1  
62  $N = 22$ ; RAB-35  $N = 12$ ; ARF-6  $N = 24$ . . Scale bar,  $5 \mu\text{m}$ . **D)** Histogram depicting exopher frequency in  
63 wild-type, *cnt-1(tm2313)*, *rab-35(b1034)* and *arf-6(tm1447)* mutants. \*\*\*  $P < 0.001$ , \*\* $P < 0.01$ , \* $P < 0.05$  by  
64 the Cochran-Mantel Haenszel (CMH) test,  $n=50$  over 5 trials. **E)** Histogram depicting exopher frequency in  
65 animals expressing touch neuron-specific GFP from the *mec-17* promoter (*uIs31*), compared with *uIs31; arf-*  
66 *6(tm1447)* animals. \*\* $P < 0.01$  by the Cochran-Mantel Haenszel (CMH) test,  $N = 50$  per trial over 4 trials. **F)**  
67 Histogram depicting exopher frequency in wild-type and *arf-6(ns388)* gain-of-function mutant. \*\* $P < 0.01$  by  
68 the Cochran-Mantel Haenszel (CMH) test,  $N = 50$  per trial over 5 trials. **G)** Histogram depicting exopher  
69 frequency in wild-type, *cnt-1* and *rab-35* single mutants and double mutants with *arf-6(tm1447)*. \*\* $P < 0.01$  \* $P$   
70  $< 0.05$  by the Cochran-Mantel Haenszel (CMH) test,  $N = 50$  per trial over 5 trials. **H-J)** Rescue experiments  
71 showing exopher and starry night frequency rescue by hypodermis-specific expression of *rab-35*, *cnt-1* and *arf-*  
72 *6* in their cognate mutants. **K)** Histogram depicting exopher and starry night numbers in *daf-2* mutant and in the  
73 double mutant with *daf-2* and *arf-6*. \*\*\*\* $P < 0.0001$ , \*\* $P < 0.01$  by the Cochran-Mantel Haenszel (CMH) test,  
74  $N = 50$ , over 7 trials. **L)** Histogram depicting attached exopher rate in *daf-2(e1370)* mutant background to  
75 potentiate baseline exophergenesis and double mutant with *arf-6*. \*\* $P < 0.01$  by two-tailed unpaired *t*-test.  $N =$

50 per trial over 7 trials. \*\*\*\* P < 0.0001, \*\*\*P < 0.001, \*\*P < 0.01, \*P < 0.05 by the Cochran-Mantel  
Haenszel (CMH) test, N = 50 per trial. **M**) Diagram indicating hypodermal ARF-6 influence on exopher  
budding and engulfment, and negative-regulation of ARF-6 by CNT-1 and RAB-35.

**Figure 6—source data 1. Numerical data for Figure 6.**

**Figure 6 – Figure Supplement 1. CNT-1 is required for exopher-laden phagosome maturation.** Line Graph  
depicting exopher and starry night frequency on different days of adulthood in wild-type and *cnt-1(tm2313)*  
mutants. N=50 per trial with 3 trials.

**Figure 6 – Figure Supplement 1—source data 1. Numerical data for Figure 6 – Figure Supplement 1.**

**Figure 6 – Figure Supplement 2. Hypodermal overexpression of CNT-1 can suppress exopher  
accumulation due to loss of RAB-35, but not *vice versa*.** Histograms depict the results of exopher frequency  
experiments testing the ability of hypodermis-specific overexpression of *rab-35(+)* to suppress *cnt-1(tm2313)*,  
and hypodermis-specific overexpression of *cnt-1(+)* to suppress *rab-35(b1034)*. \*\*\*\* p<0.0001, \*\*\*\*p<0.001,  
\*p<0.05 by the Cochran-Mantel Haenszel (CMH) test, N=50 Day 2 animals per trial over 6 trials.

**Figure 6 – Figure Supplement 2—source data 1. Numerical data for Figure 6 – Figure Supplement 2.**

**Figure 6 – Figure Supplement 3. Hypodermal ARF-6 puncta decorate the periphery of engulfed exophers  
and are increased upon loss of CNT-1.** Fluorescence micrographs displaying mCherry labeled ALMR  
exophers and/or soma and hypodermally expressed ARF-6::mNeonGreen in wild-type and *cnt-1(tm2313)*  
mutant backgrounds. Histogram depicts the total intensity of hypodermal ARF-6::mNeonGreen signal around  
the exopher periphery, comparing wild-type and *cnt-1(tm2313)* mutants. \*\*P < 0.01 by two-tailed unpaired t-  
test. n=26 (WT) and n=18 (*cnt-1* mutant). Scale bar, 5  $\mu$ m.



02  
03 **Figure 6 – Figure Supplement 3—source data 1. Numerical data for Figure 6 – Figure Supplement 3.**

04  
05 **Figure 6 – Figure Supplement 4: *arf-6* mutants maintain early ALM budding.** (A) Fluorescence  
06 micrographs show a successful exopher produced in the *daf-2(e1370)* mutant, and an apparent arrested bud in a  
07 *daf-2(e1370); arf-6(tm1447)* double mutant (B) Histograms depict the results of bud frequency observed in *daf-*  
08 *2(e1370)* (Control) and *daf-2; arf-6(tm1447)* double mutants (*arf-6*). NS =  $p > .05$  by the Cochran-Mantel  
09 Haenszel (CMH) test.

10  
11 **Figure 6 – Figure Supplement 4—source data 1. Numerical data for Figure 6 – Figure Supplement 4.**

12  
13 **Figure 7. Hypodermis-specific RNAi identifies SEC-10/Exocyst and PPK-1/PI-5 kinase as likely ARF-6**  
14 **effectors in exopher production and phagocytosis.**

15 **A-F)** Histograms depict exopher and starry night numbers after hypodermis-specific RNAi for candidate ARF-6  
16 effectors. EV indicates empty vector control, *arf-6* encodes GTPase ARF-6/Arf6, *ppk-1* encodes  
17 phosphatidylinositol-4-phosphate 5-kinase, *rfip-1* encodes the *C. elegans* homolog of Rab11-FIP3/Arfophilin,  
18 *pld-1* encodes the *C. elegans* homolog of phospholipases D1 and D2, *unc-16* encodes the *C. elegans* homolog of  
19 C-Jun-amino-terminal kinase-interacting protein 3 (JIP3), and *sec-10* encodes the *C. elegans* homolog of  
20 Exocyst subunit Sec10. \*\*P < 0.01, \*P < 0.05 by the Cochran-Mantel Haenszel (CMH) test, N =50 per trial  
21 over 4 trials. **G)** Histogram depicting attached exopher rate in hypodermis-specific RNAi for *ppk-1*. \*\*P < 0.01  
22 by two-tailed unpaired t-test. N = 50 per trial over 7 trials.

23  
24 **Figure 7—source data 1. Numerical data for Figure 7.**

25  
26 **Figure 8. CED-1 functions in exopher recognition and exopher production.**

27 **A)** Histogram depicting exopher and starry night numbers in wild-type and *ced-1(e1735)* mutant. N = 22. \*\*\*\*  
28 P < 0.0001, \*\*P < 0.01 by the Cochran-Mantel Haenszel (CMH) test, N = 50 per trial over 7 trials. **B)**  
29 Histogram depicting exopher numbers in wild-type, *ced-1(e1735)*, and *ced-1(e1735)* expressing CED-1(+) from  
30 a hypodermis-specific promoter. N = 22. \*\*\*\* P < 0.0001, \*\*P < 0.01 by the Cochran-Mantel Haenszel (CMH)  
31 test, N = 50 per trial over 3 trials. **C)** Fluorescence micrographs showing intact exophers interacting with  
32 hypodermal CED-1ΔC::GFP. Scale bar, 5 μm. Histogram depicts overlapping volume of hypodermal CED-  
33 1ΔC::GFP with exopher. \*\*\*\* P < 0.0001 by two-tailed unpaired t-test. **D)** Histogram depicting exopher and  
34 starry night numbers in wild-type, *ttr-52(tm2078)*, and *anoh-1(tm4762)* mutants. \*\*\*\* P < 0.0001, \*\*\* P <  
35 0.001, \*\*P < 0.01 by the Cochran-Mantel Haenszel (CMH) test, N = 50 per trial over 4 trials. **E)** Histogram  
36 depicting exopher and starry night numbers in wild-type and *ced-10(n3246)* mutants. \*\*\*\* P < 0.0001, \*\* P <  
37 0.01 by the Cochran-Mantel Haenszel (CMH) test, N = 50 per trial over 3 trials. **F)** Histogram depicting  
38 exopher and starry night numbers after hypodermis-specific knockdown in empty vector control and *ced-*  
39 *10(RNAi)* animals. \*\*\*\* P < 0.0001, \*\* P < 0.01 by the Cochran-Mantel Haenszel (CMH) test, N = 50 per trial  
40 over 3 trials. **G)** Fluorescence micrographs showing intact exophers interacting with hypodermal  
41 mNeonGreen::CED-10. Scale bar, 5 μm. Histogram depicts overlapping volume of hypodermal  
42 mNeonGreen::CED-10 with exopher and soma. \*\* P < 0.01 by two-tailed unpaired t-test. **H)** Model of ALMR-  
43 neuron derived exopher recognition, engulfment, and processing by the surrounding hypodermis.  
44

45 **Figure 8—source data 1. Numerical data for Figure 8.**

46  
47 **Figure 8 – Figure Supplement 1. Hypodermal CED-1 distinguishes between exopher and soma.**

48 Fluorescence micrographs display an early stage, or fully formed but attached, ALMR-derived exophers  
49 decorated by hypodermal CED-1ΔC::GFP. Note lack of CED-1 labeling of attached neuronal soma. Scale bar,  
50 5 μm.  
51

52 **Figure 8 – Figure Supplement 2. *arf-6* and *ced-1* mutants display reduced touch sensitivity in old age.**

53 Synchronized WT, *arf-6(tm1447)*, and *ced-1(e1735)* animals were touch tested on adult day 5 and 10 and  
54 scored for reversal of direction. 3 biological replicates of 30 animals/replicate.

56 **Figure 8 – Figure Supplement 2—source data 1. Numerical data for Figure 8 – Figure Supplement 2.**

58 **Supplementary File 1.** Table of strains used in this study

50 **Video 1. Exophers tubulate and vesiculate to form Starry Night vesicles.**

51 mCherry filled ALMR neuron-derived exopher tubulates and vesiculates after release from the neuron. Video  
52 depicts a 3 hour 17 minute time-course, 5 min per frame.

54 **Video 2. Hypodermal F-actin dynamics mark engulfment of the neuronal exopher.**

55 An mCherry-filled ALMR neuron soma is shown during exopher production, with hypodermis-specific  
56 expression of mNeonGreen::UtrCH marking F-actin accumulation and dynamics during engulfment. Video  
57 depicts a 90 minute time-course, 15 min per frame.

59 **Video 3. Exopher budding in a *daf-2* mutant.**

70 An mCherry-filled ALMR neuron soma in a *daf-2(e1370)* mutant is shown during exopher production. Video  
71 depicts a 4 hr time-course, 4 min per frame.

73 **Video 4. Early bud formation in *daf-2; arf-6* double mutant.**

74 An mCherry-filled ALMR neuron soma in a *daf-2(e1370); arf-6(tm1447)* double mutant is shown producing a  
75 small bud from the soma. Video depicts a 4 hr time-course, 4 min per frame.

## 78 REFERENCES

- 79 1. Labbadia J, Morimoto RI. The biology of proteostasis in aging and disease. *Annu Rev Biochem.*  
30 2015;84:435-64. Epub 20150312. doi: 10.1146/annurev-biochem-060614-033955. PubMed PMID: 25784053;  
31 PubMed Central PMCID: PMCPMC4539002.
- 32 2. Kurtishi A, Rosen B, Patil KS, Alves GW, Moller SG. Cellular Proteostasis in Neurodegeneration. *Mol*  
33 *Neurobiol.* 2019;56(5):3676-89. Epub 20180904. doi: 10.1007/s12035-018-1334-z. PubMed PMID: 30182337.
- 34 3. Davis AA, Leyns CEG, Holtzman DM. Intercellular Spread of Protein Aggregates in Neurodegenerative  
35 Disease. *Annu Rev Cell Dev Biol.* 2018;34:545-68. Epub 20180725. doi: 10.1146/annurev-cellbio-100617-  
36 062636. PubMed PMID: 30044648; PubMed Central PMCID: PMCPMC6350082.
- 37 4. Melentijevic I, Toth ML, Arnold ML, Guasp RJ, Harinath G, Nguyen KC, et al. *C. elegans* neurons  
38 jettison protein aggregates and mitochondria under neurotoxic stress. *Nature.* 2017;542(7641):367-71. Epub  
39 2017/02/09. doi: 10.1038/nature21362. PubMed PMID: 28178240; PubMed Central PMCID:  
40 PMCPMC5336134.
- 41 5. Nicolas-Avila JA, Pena-Couso L, Munoz-Canoves P, Hidalgo A. Macrophages, Metabolism and  
42 Heterophagy in the Heart. *Circ Res.* 2022;130(3):418-31. Epub 20220203. doi:  
43 10.1161/CIRCRESAHA.121.319812. PubMed PMID: 35113662.
- 44 6. Nicolás-Ávila JA, Lechuga-Vieco AV, Esteban-Martínez L, Sánchez-Díaz M, Díaz-García E, Santiago  
45 DJ, et al. A Network of Macrophages Supports Mitochondrial Homeostasis in the Heart. *Cell.* 2020;183(1):94-  
46 109.e23. Epub 2020/09/17. doi: 10.1016/j.cell.2020.08.031. PubMed PMID: 32937105.
- 47 7. Cooper JF, Guasp RJ, Arnold ML, Grant BD, Driscoll M. Stress increases in exopher-mediated neuronal  
48 extrusion require lipid biosynthesis, FGF, and EGF RAS/MAPK signaling. *Proc Natl Acad Sci U S A.*  
49 2021;118(36). Epub 2021/09/04. doi: 10.1073/pnas.2101410118. PubMed PMID: 34475208; PubMed Central  
50 PMCID: PMCPMC8433523.
- 51 8. Siddique I, Di J, Williams CK, Markovic D, Vinters HV, Bitan G. Exophers are components of  
52 mammalian cell neurobiology in health and disease. *bioRxiv.* 2021; <https://doi.org/10.1101/2021.12.06.471479>.

9. Arnold ML, Cooper J, Grant BD, Driscoll M. Quantitative Approaches for Scoring in vivo Neuronal Aggregate and Organelle Extrusion in Large Exopher Vesicles in *C. elegans*. *J Vis Exp*. 2020;(163). Epub 2020/10/06. doi: 10.3791/61368. PubMed PMID: 33016946; PubMed Central PMCID: PMC7805482.
10. Bounoutas A, Chalfie M. Touch sensitivity in *Caenorhabditis elegans*. *Pflugers Arch*. 2007;454(5):691-702. Epub 2007/02/08. doi: 10.1007/s00424-006-0187-x. PubMed PMID: 17285303.
11. Labbadia J, Morimoto RI. Proteostasis and longevity: when does aging really begin? *F1000Prime Rep*. 2014;6:7. Epub 2014/03/05. doi: 10.12703/p6-7. PubMed PMID: 24592319; PubMed Central PMCID: PMC3914504.
12. Morimoto RI. Cell-Nonautonomous Regulation of Proteostasis in Aging and Disease. *Cold Spring Harb Perspect Biol*. 2020;12(4). Epub 2019/04/10. doi: 10.1101/cshperspect.a034074. PubMed PMID: 30962274; PubMed Central PMCID: PMC7111247.
13. Levin R, Grinstein S, Canton J. The life cycle of phagosomes: formation, maturation, and resolution. *Immunol Rev*. 2016;273(1):156-79. Epub 2016/08/26. doi: 10.1111/imr.12439. PubMed PMID: 27558334.
14. Ghose P, Wehman AM. The developmental and physiological roles of phagocytosis in *Caenorhabditis elegans*. *Curr Top Dev Biol*. 2021;144:409-32. Epub 2021/05/17. doi: 10.1016/bs.ctdb.2020.09.001. PubMed PMID: 33992160.
15. Philipp TM, Gong W, Köhnlein K, Ohse VA, Müller FI, Prieb J, et al. SEMO-1, a novel methanethiol oxidase in *Caenorhabditis elegans*, is a pro-aging factor conferring selective stress resistance. *Biofactors*. 2022;48(3):699-706. Epub 2022/03/23. doi: 10.1002/biof.1836. PubMed PMID: 35316559.
16. Winder SJ, Hemmings L, Maciver SK, Bolton SJ, Tinsley JM, Davies KE, et al. Utrophin actin binding domain: analysis of actin binding and cellular targeting. *J Cell Sci*. 1995;108 ( Pt 1):63-71. doi: 10.1242/jcs.108.1.63. PubMed PMID: 7738117.
17. Lemmon MA, Ferguson KM, O'Brien R, Sigler PB, Schlessinger J. Specific and high-affinity binding of inositol phosphates to an isolated pleckstrin homology domain. *Proc Natl Acad Sci U S A*. 1995;92(23):10472-6. doi: 10.1073/pnas.92.23.10472. PubMed PMID: 7479822; PubMed Central PMCID: PMC40633.

18. Botelho RJ, Teruel M, Dierckman R, Anderson R, Wells A, York JD, et al. Localized biphasic changes in phosphatidylinositol-4,5-bisphosphate at sites of phagocytosis. *J Cell Biol.* 2000;151(7):1353-68. doi: 10.1083/jcb.151.7.1353. PubMed PMID: 11134066; PubMed Central PMCID: PMCPMC2150667.
19. Goley ED, Welch MD. The ARP2/3 complex: an actin nucleator comes of age. *Nat Rev Mol Cell Biol.* 2006;7(10):713-26. doi: 10.1038/nrm2026. PubMed PMID: 16990851.
20. Lee H, Flynn R, Sharma I, Haberman E, Carling PJ, Nicholls FJ, et al. LRRK2 Is Recruited to Phagosomes and Co-recruits RAB8 and RAB10 in Human Pluripotent Stem Cell-Derived Macrophages. *Stem Cell Reports.* 2020;14(5):940-55. Epub 20200430. doi: 10.1016/j.stemcr.2020.04.001. PubMed PMID: 32359446; PubMed Central PMCID: PMCPMC7221108.
21. Liu O, Grant BD. Basolateral Endocytic Recycling Requires RAB-10 and AMPH-1 Mediated Recruitment of RAB-5 GAP TBC-2 to Endosomes. *PLoS Genet.* 2015;11(9):e1005514. Epub 20150922. doi: 10.1371/journal.pgen.1005514. PubMed PMID: 26393361; PubMed Central PMCID: PMCPMC4578947.
22. Etoh K, Fukuda M. Rab10 regulates tubular endosome formation through KIF13A and KIF13B motors. *J Cell Sci.* 2019;132(5). Epub 20190219. doi: 10.1242/jcs.226977. PubMed PMID: 30700496.
23. Zajac AL, Horne-Badovinac S. Kinesin-directed secretion of basement membrane proteins to a subdomain of the basolateral surface in *Drosophila* epithelial cells. *Curr Biol.* 2022;32(4):735-48 e10. Epub 20220111. doi: 10.1016/j.cub.2021.12.025. PubMed PMID: 35021047; PubMed Central PMCID: PMCPMC8891071.
24. Peña-Ramos O, Chiao L, Liu X, Yu X, Yao T, He H, et al. Autophagosomes fuse to phagosomes and facilitate the degradation of apoptotic cells in *Caenorhabditis elegans*. *Elife.* 2022;11. Epub 2022/01/05. doi: 10.7554/eLife.72466. PubMed PMID: 34982028; PubMed Central PMCID: PMCPMC8769646.
25. Fazeli G, Stetter M, Lisack JN, Wehman AM. *C. elegans* Blastomeres Clear the Corpse of the Second Polar Body by LC3-Associated Phagocytosis. *Cell Rep.* 2018;23(7):2070-82. Epub 2018/05/17. doi: 10.1016/j.celrep.2018.04.043. PubMed PMID: 29768205.
26. Levin-Konigsberg R, Montaña-Rendón F, Keren-Kaplan T, Li R, Ego B, Mylvaganam S, et al. Phagolysosome resolution requires contacts with the endoplasmic reticulum and phosphatidylinositol-4-

- 54 phosphate signalling. *Nat Cell Biol.* 2019;21(10):1234-47. Epub 2019/10/02. doi: 10.1038/s41556-019-0394-2.  
55 PubMed PMID: 31570833; PubMed Central PMCID: PMCPMC8340083.
- 56 27. Fazeli G, Levin-Konigsberg R, Bassik MC, Stigloher C, Wehman AM. A BORC-dependent molecular  
57 pathway for vesiculation of cell corpse phagolysosomes. *Curr Biol.* 2023. Epub 20230107. doi:  
58 10.1016/j.cub.2022.12.041. PubMed PMID: 36652947.
- 59 28. Haley R, Wang Y, Zhou Z. The small GTPase RAB-35 defines a third pathway that is required for the  
60 recognition and degradation of apoptotic cells. *PLoS Genet.* 2018;14(8):e1007558. Epub 2018/08/24. doi:  
61 10.1371/journal.pgen.1007558. PubMed PMID: 30138370; PubMed Central PMCID: PMCPMC6107108.
- 62 29. Kutscher LM, Keil W, Shaham S. RAB-35 and ARF-6 GTPases Mediate Engulfment and Clearance  
63 Following Linker Cell-Type Death. *Dev Cell.* 2018;47(2):222-38.e6. Epub 2018/09/18. doi:  
64 10.1016/j.devcel.2018.08.015. PubMed PMID: 30220571; PubMed Central PMCID: PMCPMC6200590.
- 65 30. Sato M, Sato K, Liou W, Pant S, Harada A, Grant BD. Regulation of endocytic recycling by *C. elegans*  
66 Rab35 and its regulator RME-4, a coated-pit protein. *Embo j.* 2008;27(8):1183-96. Epub 2008/03/21. doi:  
67 10.1038/emboj.2008.54. PubMed PMID: 18354496; PubMed Central PMCID: PMCPMC2367398.
- 68 31. Niedergang F, Colucci-Guyon E, Dubois T, Raposo G, Chavrier P. ADP ribosylation factor 6 is  
69 activated and controls membrane delivery during phagocytosis in macrophages. *J Cell Biol.* 2003;161(6):1143-  
70 50. Epub 2003/06/18. doi: 10.1083/jcb.200210069. PubMed PMID: 12810696; PubMed Central PMCID:  
71 PMCPMC2172982.
- 72 32. Doughman RL, Firestone AJ, Anderson RA. Phosphatidylinositol phosphate kinases put PI4,5P(2) in its  
73 place. *J Membr Biol.* 2003;194(2):77-89. Epub 2003/09/23. doi: 10.1007/s00232-003-2027-7. PubMed PMID:  
74 14502432.
- 75 33. Mangahas PM, Zhou Z. Clearance of apoptotic cells in *Caenorhabditis elegans*. *Semin Cell Dev Biol.*  
76 2005;16(2):295-306. Epub 2005/03/31. doi: 10.1016/j.semcdb.2004.12.005. PubMed PMID: 15797839.
- 77 34. Zhou Z, Hartweg E, Horvitz HR. CED-1 is a transmembrane receptor that mediates cell corpse  
78 engulfment in *C. elegans*. *Cell.* 2001;104(1):43-56. Epub 2001/02/13. doi: 10.1016/s0092-8674(01)00190-8.  
79 PubMed PMID: 11163239.

- 30 35. Wang X, Li W, Zhao D, Liu B, Shi Y, Chen B, et al. Caenorhabditis elegans transthyretin-like protein  
31 TTR-52 mediates recognition of apoptotic cells by the CED-1 phagocyte receptor. *Nat Cell Biol.*  
32 2010;12(7):655-64. Epub 20100606. doi: 10.1038/ncb2068. PubMed PMID: 20526330; PubMed Central  
33 PMCID: PMCPMC2896453.
- 34 36. Li Z, Venegas V, Nagaoka Y, Morino E, Raghavan P, Audhya A, et al. Necrotic Cells Actively Attract  
35 Phagocytes through the Collaborative Action of Two Distinct PS-Exposure Mechanisms. *PLoS Genet.*  
36 2015;11(6):e1005285. Epub 20150610. doi: 10.1371/journal.pgen.1005285. PubMed PMID: 26061275;  
37 PubMed Central PMCID: PMCPMC4464654.
- 38 37. Furuta Y, Pena-Ramos O, Li Z, Chiao L, Zhou Z. Calcium ions trigger the exposure of  
39 phosphatidylserine on the surface of necrotic cells. *PLoS Genet.* 2021;17(2):e1009066. Epub 20210211. doi:  
40 10.1371/journal.pgen.1009066. PubMed PMID: 33571185; PubMed Central PMCID: PMCPMC7904182.
- 41 38. Raiders S, Han T, Scott-Hewitt N, Kucenas S, Lew D, Logan MA, et al. Engulfed by Glia: Glial Pruning  
42 in Development, Function, and Injury across Species. *J Neurosci.* 2021;41(5):823-33. Epub 2021/01/21. doi:  
43 10.1523/jneurosci.1660-20.2020. PubMed PMID: 33468571; PubMed Central PMCID: PMCPMC7880271.
- 44 39. Pearce MMP, Spartz EJ, Hong W, Luo L, Kopito RR. Prion-like transmission of neuronal huntingtin  
45 aggregates to phagocytic glia in the Drosophila brain. *Nat Commun.* 2015;6:6768. Epub 20150413. doi:  
46 10.1038/ncomms7768. PubMed PMID: 25866135; PubMed Central PMCID: PMCPMC4515032.
- 47 40. Lu N, Shen Q, Mahoney TR, Liu X, Zhou Z. Three sorting nexins drive the degradation of apoptotic  
48 cells in response to PtdIns(3)P signaling. *Mol Biol Cell.* 2011;22(3):354-74. Epub 2010/12/15. doi:  
49 10.1091/mbc.E10-09-0756. PubMed PMID: 21148288; PubMed Central PMCID: PMCPMC3031466.
- 50 41. Lu N, Shen Q, Mahoney TR, Neukomm LJ, Wang Y, Zhou Z. Two PI 3-kinases and one PI 3-  
51 phosphatase together establish the cyclic waves of phagosomal PtdIns(3)P critical for the degradation of  
52 apoptotic cells. *PLoS Biol.* 2012;10(1):e1001245. Epub 2012/01/25. doi: 10.1371/journal.pbio.1001245.  
53 PubMed PMID: 22272187; PubMed Central PMCID: PMCPMC3260314.



42. Cheng S, Wang K, Zou W, Miao R, Huang Y, Wang H, et al. PtdIns(4,5)P<sub>2</sub> and PtdIns3P coordinate to regulate phagosomal sealing for apoptotic cell clearance. *J Cell Biol.* 2015;210(3):485-502. Epub 2015/08/05. doi: 10.1083/jcb.201501038. PubMed PMID: 26240185; PubMed Central PMCID: PMC4523610.
43. Abdu Y, Maniscalco C, Heddleston JM, Chew TL, Nance J. Developmentally programmed germ cell remodelling by endodermal cell cannibalism. *Nat Cell Biol.* 2016;18(12):1302-10. Epub 2016/11/14. doi: 10.1038/ncb3439. PubMed PMID: 27842058; PubMed Central PMCID: PMC45129868.
44. Chesneau L, Dambournet D, Machicoane M, Kouranti I, Fukuda M, Goud B, et al. An ARF6/Rab35 GTPase cascade for endocytic recycling and successful cytokinesis. *Curr Biol.* 2012;22(2):147-53. Epub 2012/01/10. doi: 10.1016/j.cub.2011.11.058. PubMed PMID: 22226746.
45. Shi A, Liu O, Koenig S, Banerjee R, Chen CC, Eimer S, et al. RAB-10-GTPase-mediated regulation of endosomal phosphatidylinositol-4,5-bisphosphate. *Proc Natl Acad Sci U S A.* 2012;109(35):E2306-15. Epub 2012/08/08. doi: 10.1073/pnas.1205278109. PubMed PMID: 22869721; PubMed Central PMCID: PMC3435156.
46. Allaire PD, Seyed Sadr M, Chaineau M, Seyed Sadr E, Konefal S, Fotouhi M, et al. Interplay between Rab35 and Arf6 controls cargo recycling to coordinate cell adhesion and migration. *J Cell Sci.* 2013;126(Pt 3):722-31. Epub 2012/12/25. doi: 10.1242/jcs.112375. PubMed PMID: 23264734.
47. Fazeli G, Trinkwalder M, Irmisch L, Wehman AM. *C. elegans* midbodies are released, phagocytosed and undergo LC3-dependent degradation independent of macroautophagy. *J Cell Sci.* 2016;129(20):3721-31. Epub 2016/08/27. doi: 10.1242/jcs.190223. PubMed PMID: 27562069; PubMed Central PMCID: PMC5087666.
48. Kinchen JM, Ravichandran KS. Identification of two evolutionarily conserved genes regulating processing of engulfed apoptotic cells. *Nature.* 2010;464(7289):778-82. Epub 2010/03/23. doi: 10.1038/nature08853. PubMed PMID: 20305638; PubMed Central PMCID: PMC2901565.
49. Poteryaev D, Datta S, Ackema K, Zerial M, Spang A. Identification of the switch in early-to-late endosome transition. *Cell.* 2010;141(3):497-508. Epub 2010/05/04. doi: 10.1016/j.cell.2010.03.011. PubMed PMID: 20434987.

- 30 50. Nordmann M, Cabrera M, Perz A, Bröcker C, Ostrowicz C, Engelbrecht-Vandré S, et al. The Mon1-  
31 Ccz1 complex is the GEF of the late endosomal Rab7 homolog Ypt7. *Curr Biol.* 2010;20(18):1654-9. Epub  
32 2010/08/28. doi: 10.1016/j.cub.2010.08.002. PubMed PMID: 20797862.
- 33 51. Donnelly KM, DeLorenzo OR, Zaya AD, Pisano GE, Thu WM, Luo L, et al. Phagocytic glia are  
34 obligatory intermediates in transmission of mutant huntingtin aggregates across neuronal synapses. *Elife.*  
35 2020;9. Epub 20200528. doi: 10.7554/eLife.58499. PubMed PMID: 32463364; PubMed Central PMCID:  
36 PMCPMC7297539.
- 37 52. Singh TD, Park SY, Bae JS, Yun Y, Bae YC, Park RW, et al. MEGF10 functions as a receptor for the  
38 uptake of amyloid-beta. *FEBS Lett.* 2010;584(18):3936-42. Epub 20100907. doi: 10.1016/j.febslet.2010.08.050.  
39 PubMed PMID: 20828568.
- 40 53. Fujita Y, Maeda T, Sato C, Sato M, Hatakeyama H, Ota Y, et al. Engulfment of Toxic Amyloid beta-  
41 protein in Neurons and Astrocytes Mediated by MEGF10. *Neuroscience.* 2020;443:1-7. Epub 20200716. doi:  
42 10.1016/j.neuroscience.2020.07.016. PubMed PMID: 32682823.
- 43 54. Brenner S. The genetics of *Caenorhabditis elegans*. *Genetics.* 1974;77(1):71-94. doi:  
44 10.1093/genetics/77.1.71. PubMed PMID: 4366476; PubMed Central PMCID: PMCPMC1213120.
- 45 55. Klassen MP, Wu YE, Maeder CI, Nakae I, Cueva JG, Lehrman EK, et al. An Arf-like small G protein,  
46 ARL-8, promotes the axonal transport of presynaptic cargoes by suppressing vesicle aggregation. *Neuron.*  
47 2010;66(5):710-23. doi: 10.1016/j.neuron.2010.04.033. PubMed PMID: 20547129; PubMed Central PMCID:  
48 PMCPMC3168544.
- 49 56. Ellis RE, Jacobson DM, Horvitz HR. Genes required for the engulfment of cell corpses during  
50 programmed cell death in *Caenorhabditis elegans*. *Genetics.* 1991;129(1):79-94. doi: 10.1093/genetics/129.1.79.  
51 PubMed PMID: 1936965; PubMed Central PMCID: PMCPMC1204584.
- 52 57. Fares H, Greenwald I. Regulation of endocytosis by CUP-5, the *Caenorhabditis elegans* mucolipin-1  
53 homolog. *Nat Genet.* 2001;28(1):64-8. doi: 10.1038/ng0501-64. PubMed PMID: 11326278.

- 54 58. Kimura KD, Tissenbaum HA, Liu Y, Ruvkun G. *daf-2*, an insulin receptor-like gene that regulates  
55 longevity and diapause in *Caenorhabditis elegans*. *Science*. 1997;277(5328):942-6. doi:  
56 10.1126/science.277.5328.942. PubMed PMID: 9252323.
- 57 59. Winston WM, Molodowitch C, Hunter CP. Systemic RNAi in *C. elegans* requires the putative  
58 transmembrane protein SID-1. *Science*. 2002;295(5564):2456-9. Epub 20020207. doi:  
59 10.1126/science.1068836. PubMed PMID: 11834782.
- 60 60. Hamelin M, Scott IM, Way JC, Culotti JG. The *mec-7* beta-tubulin gene of *Caenorhabditis elegans* is  
61 expressed primarily in the touch receptor neurons. *EMBO J*. 1992;11(8):2885-93. doi: 10.1002/j.1460-  
62 2075.1992.tb05357.x. PubMed PMID: 1639062; PubMed Central PMCID: PMCPMC556769.
- 63 61. Li Y, Chen B, Zou W, Wang X, Wu Y, Zhao D, et al. The lysosomal membrane protein SCAV-3  
64 maintains lysosome integrity and adult longevity. *J Cell Biol*. 2016;215(2):167-85. Epub 20161017. doi:  
65 10.1083/jcb.201602090. PubMed PMID: 27810910; PubMed Central PMCID: PMCPMC5084646.
- 66 62. Frokjaer-Jensen C, Davis MW, Hopkins CE, Newman BJ, Thummel JM, Olesen SP, et al. Single-copy  
67 insertion of transgenes in *Caenorhabditis elegans*. *Nat Genet*. 2008;40(11):1375-83. Epub 20081026. doi:  
68 10.1038/ng.248. PubMed PMID: 18953339; PubMed Central PMCID: PMCPMC2749959.
- 69 63. Hall DH, Hartweg E, Nguyen KC. Modern electron microscopy methods for *C. elegans*. *Methods Cell*  
70 *Biol*. 2012;107:93-149. doi: 10.1016/B978-0-12-394620-1.00004-7. PubMed PMID: 22226522.
- 71 64. Timmons L, Fire A. Specific interference by ingested dsRNA. *Nature*. 1998;395(6705):854. doi:  
72 10.1038/27579. PubMed PMID: 9804418.
- 73 65. Kamath RS, Fraser AG, Dong Y, Poulin G, Durbin R, Gotta M, et al. Systematic functional analysis of  
74 the *Caenorhabditis elegans* genome using RNAi. *Nature*. 2003;421(6920):231-7. doi: 10.1038/nature01278.  
75 PubMed PMID: 12529635.
- 76 66. Zhang Y, Ma C, Delohery T, Nasipak B, Foat BC, Bounoutas A, et al. Identification of genes expressed  
77 in *C. elegans* touch receptor neurons. *Nature*. 2002;418(6895):331-5. doi: 10.1038/nature00891. PubMed  
78 PMID: 12124626.
- 79

**A**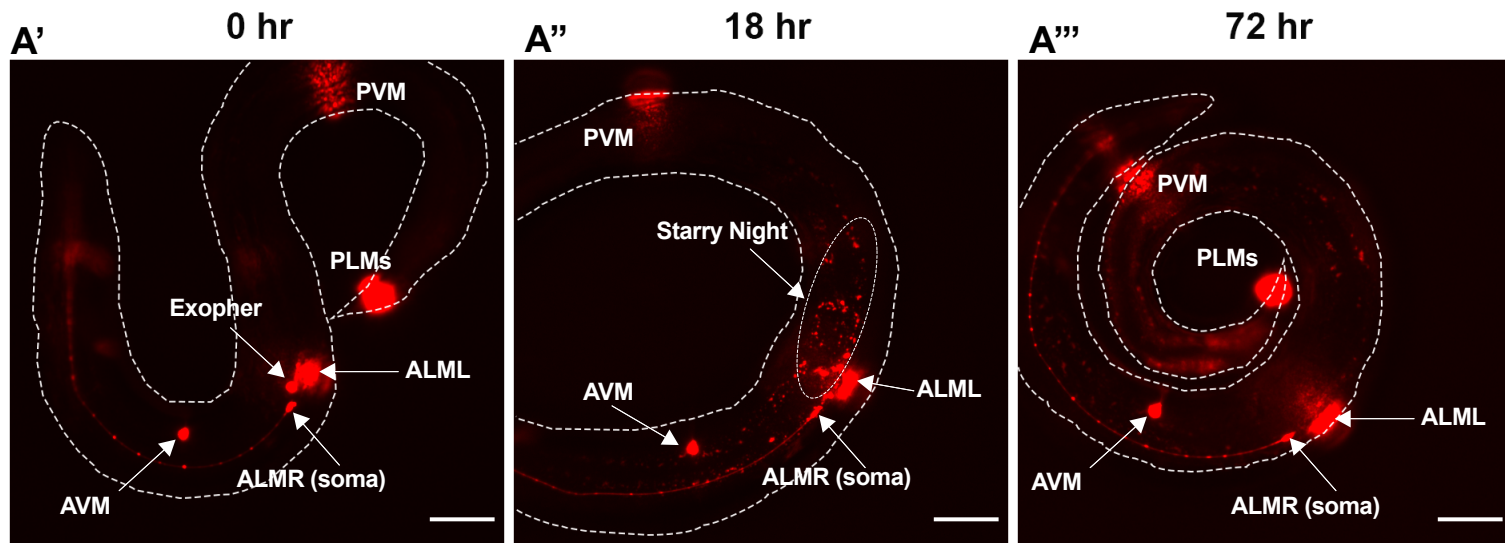**B**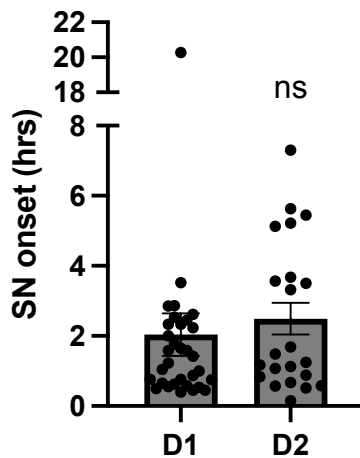**C**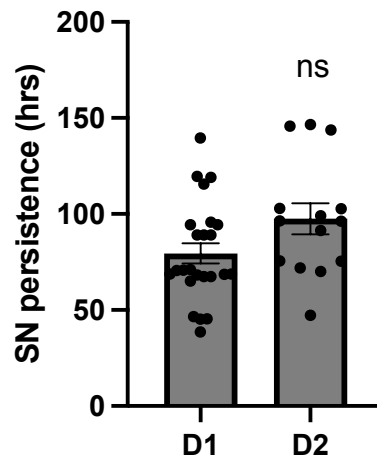

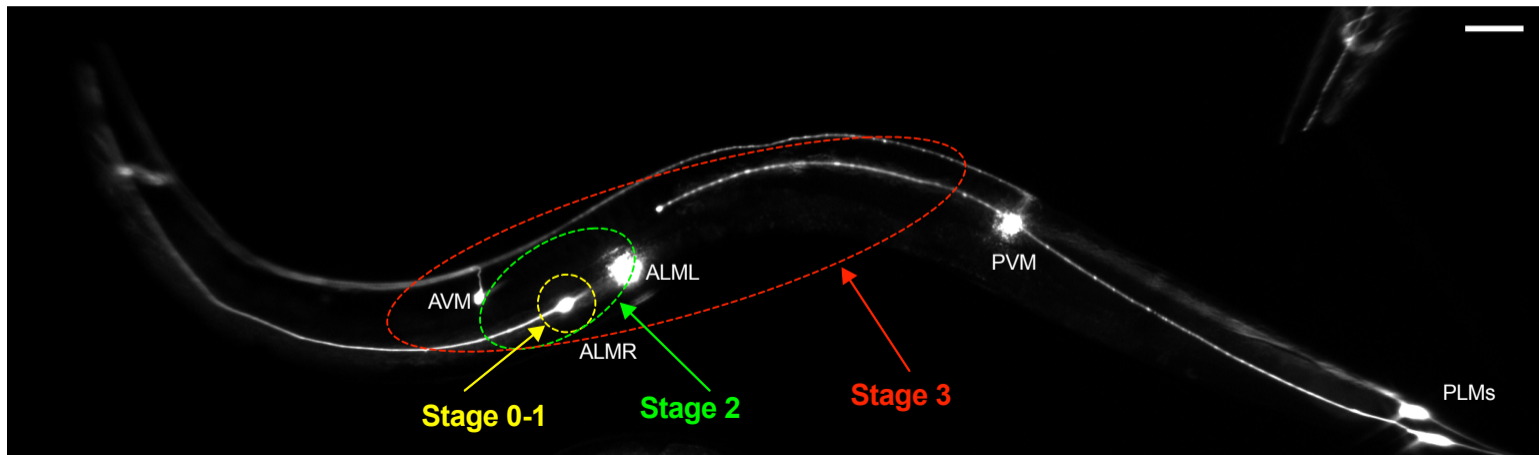

**A**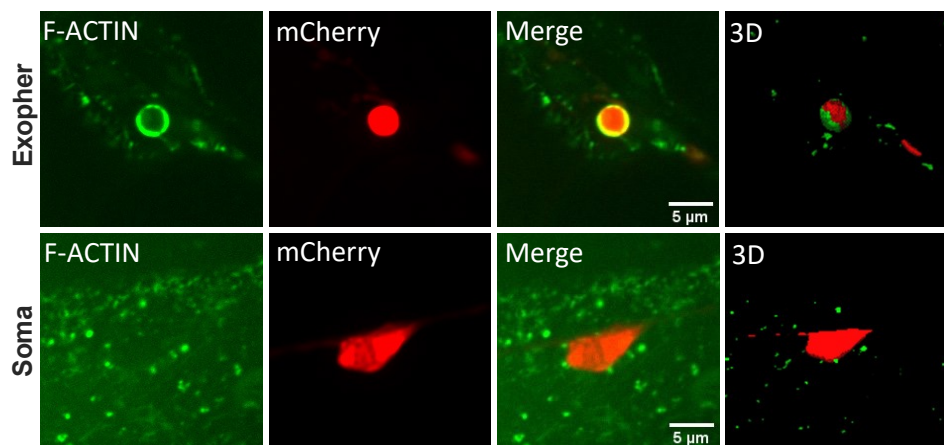**B**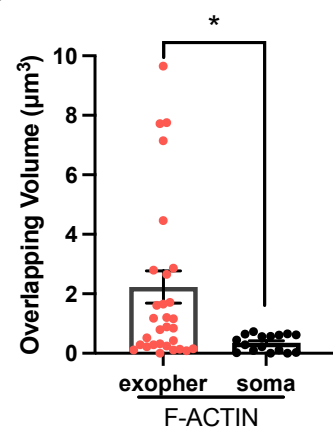**C**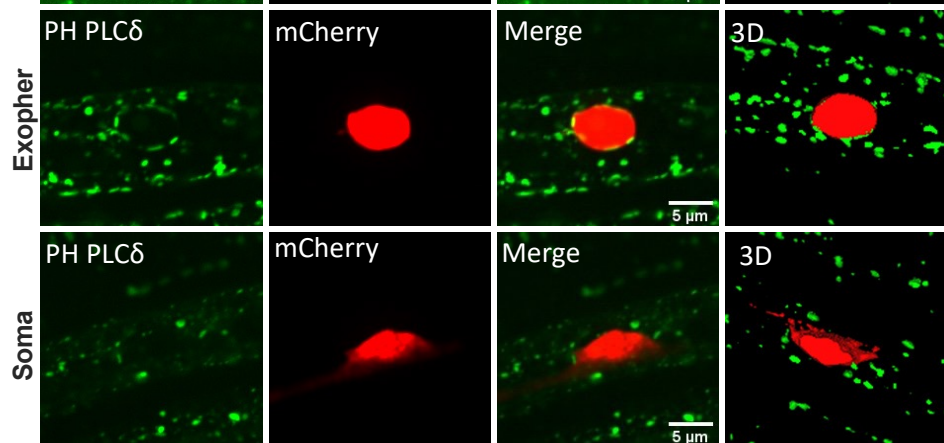**D**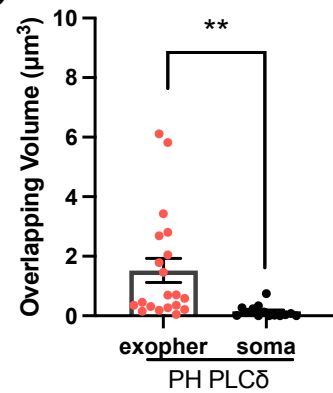**E**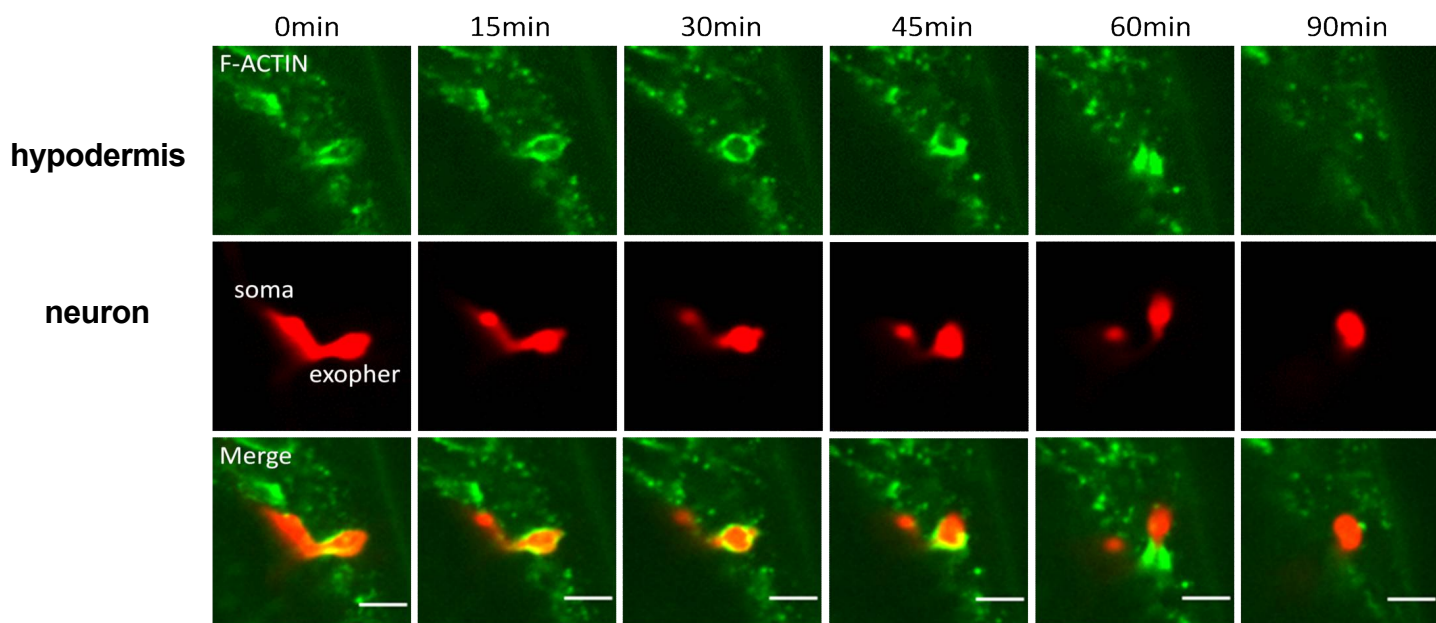**F**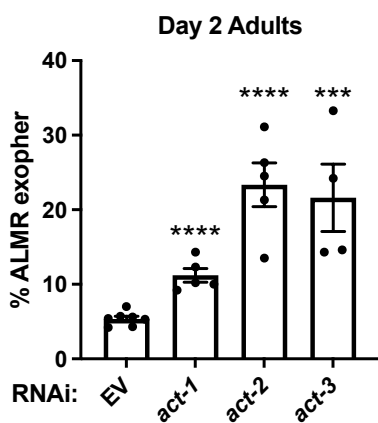**G**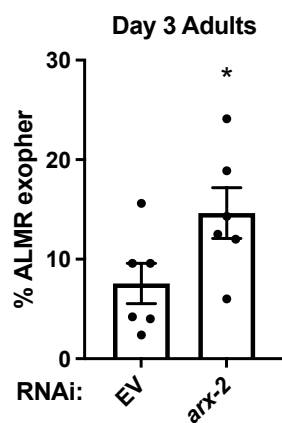**Day 3 Adults**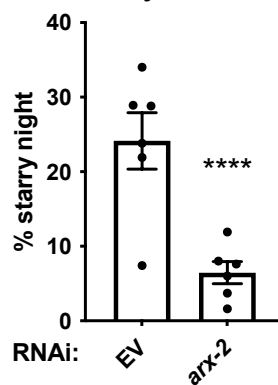**H**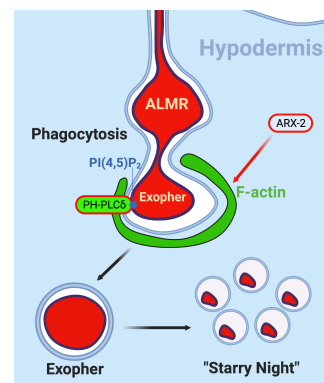

**A**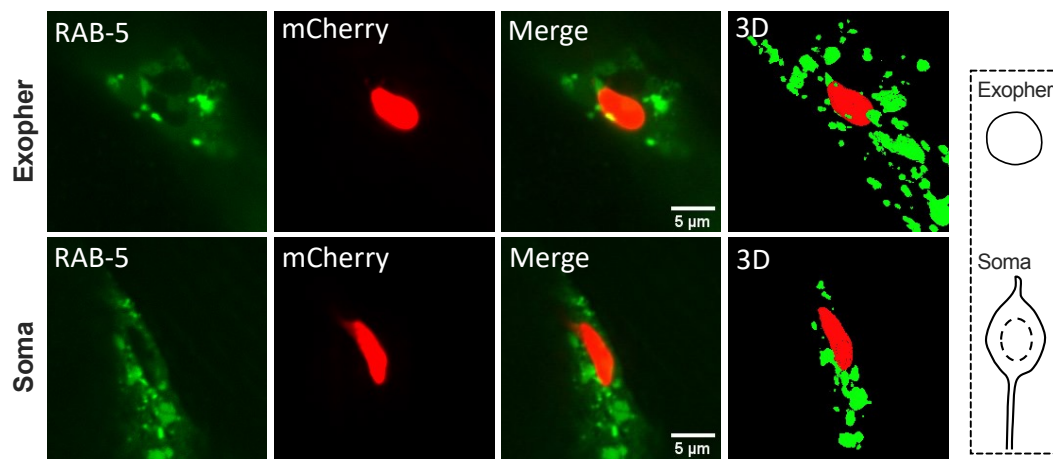**B**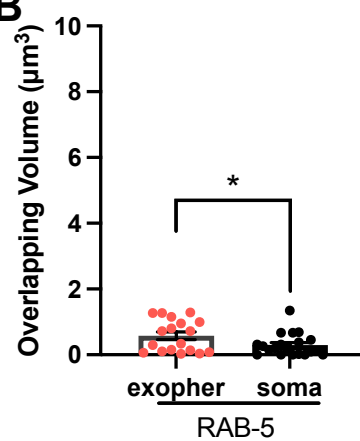**C**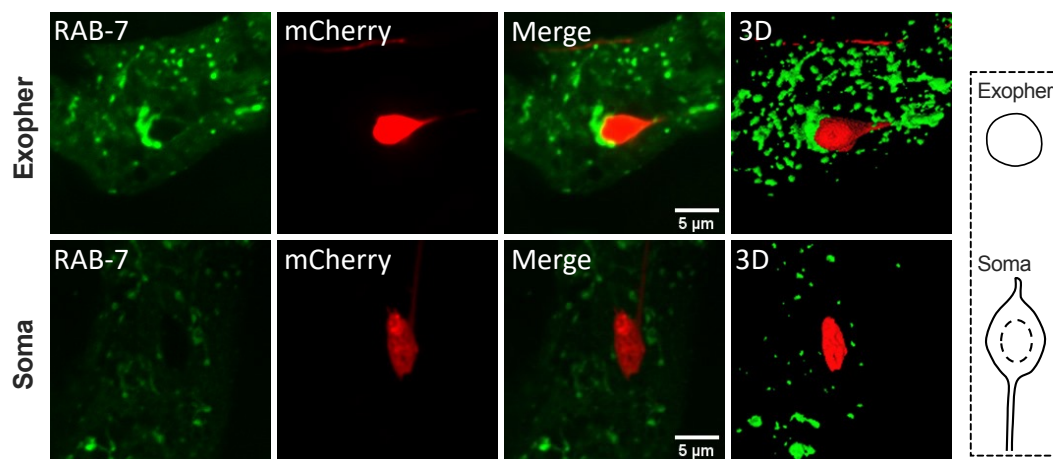**D**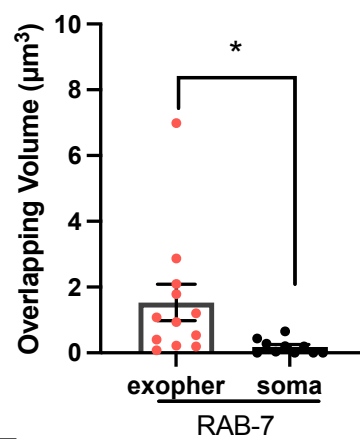**E**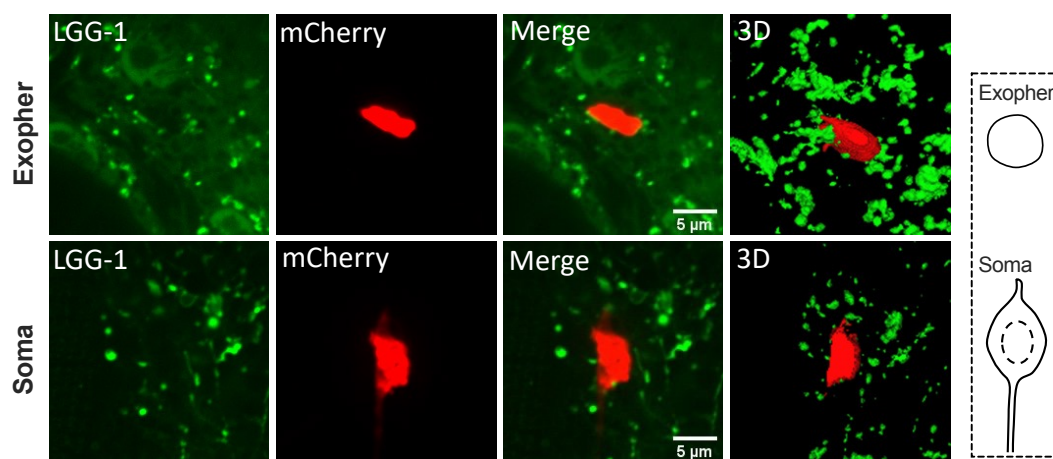**F**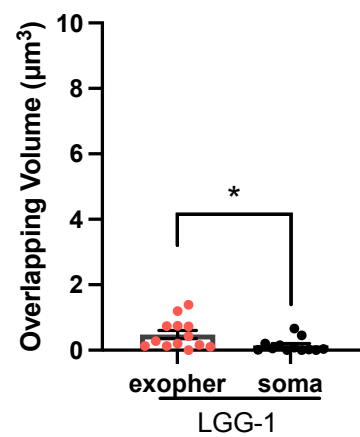**G**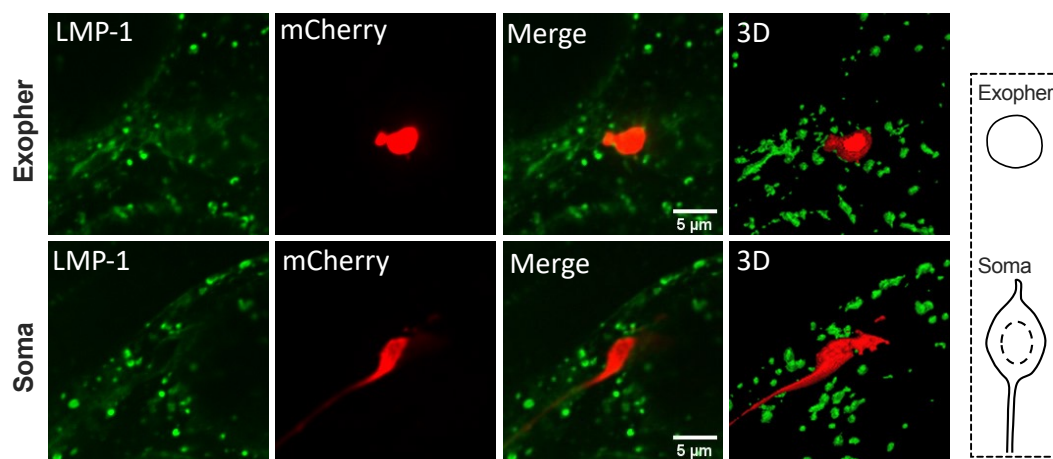**H**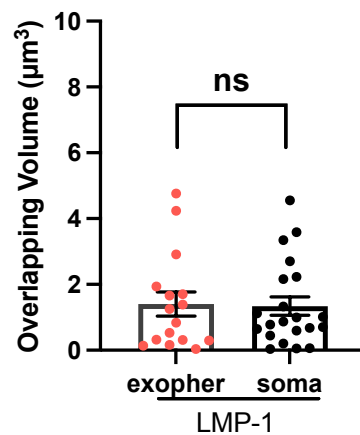

**A**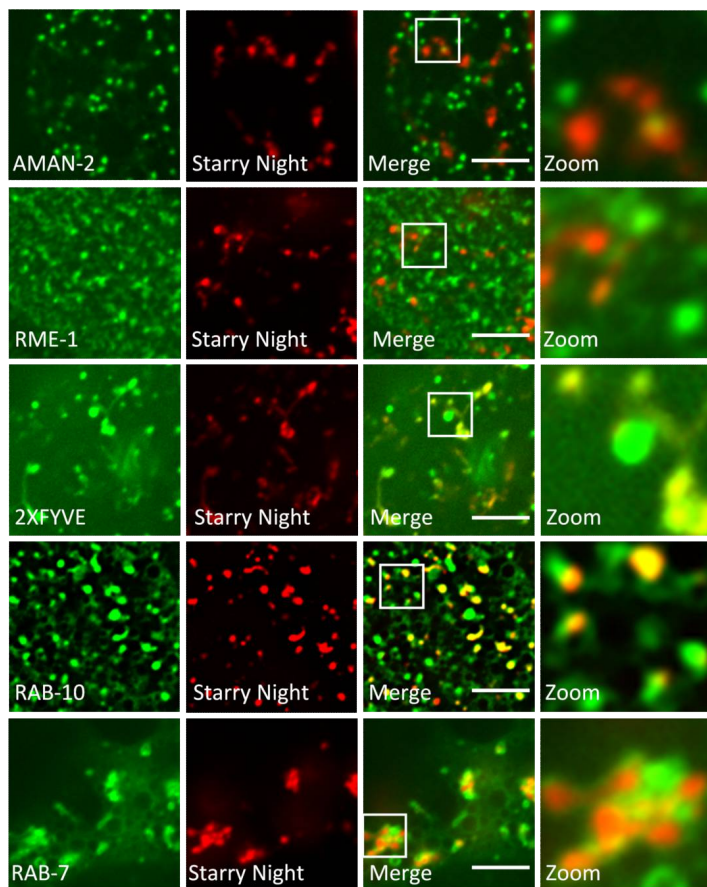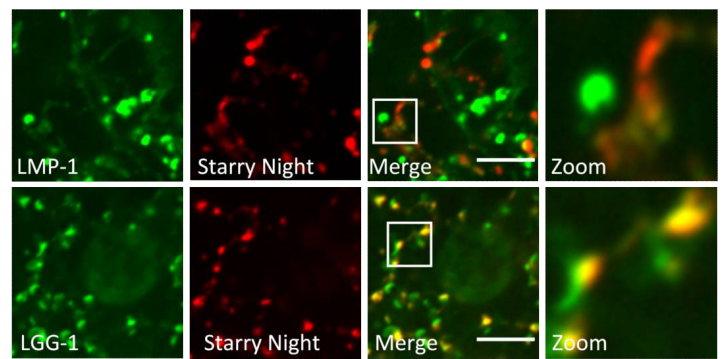**B**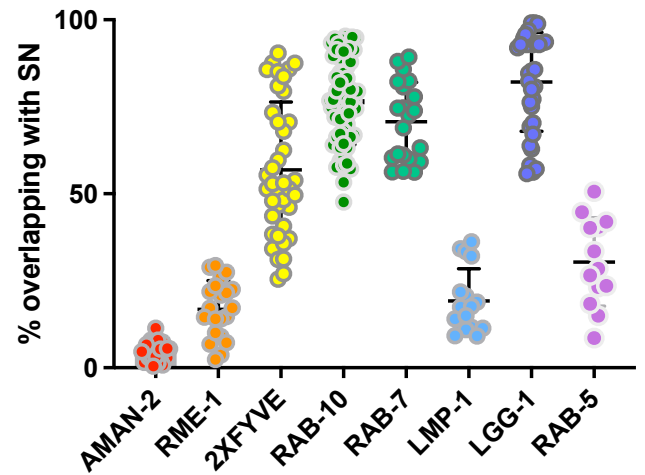**C**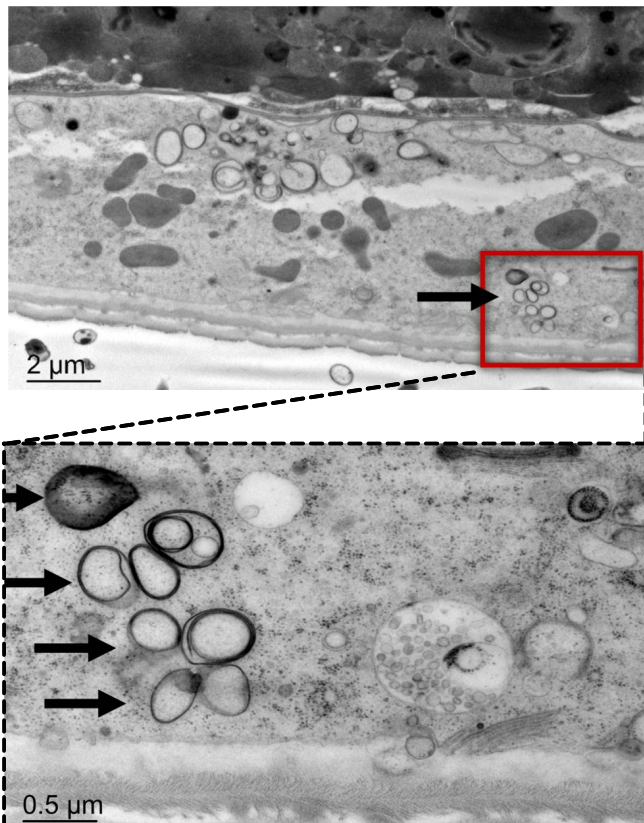**D**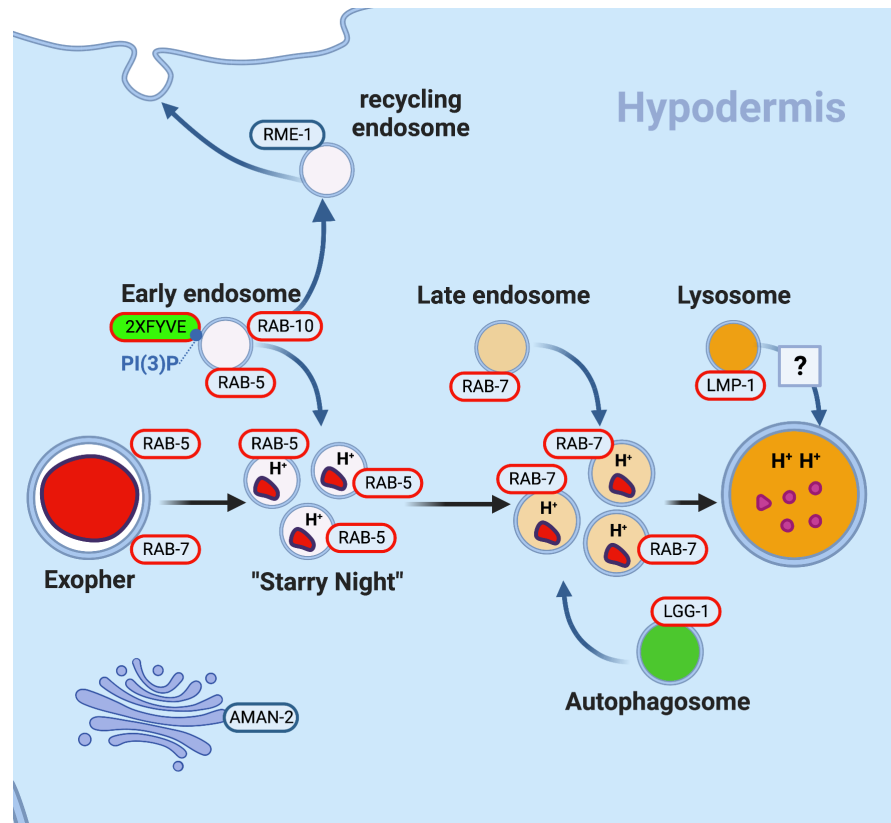



**A**

CUP-5 → Lysosome function

WT

*cup-5(ar465)*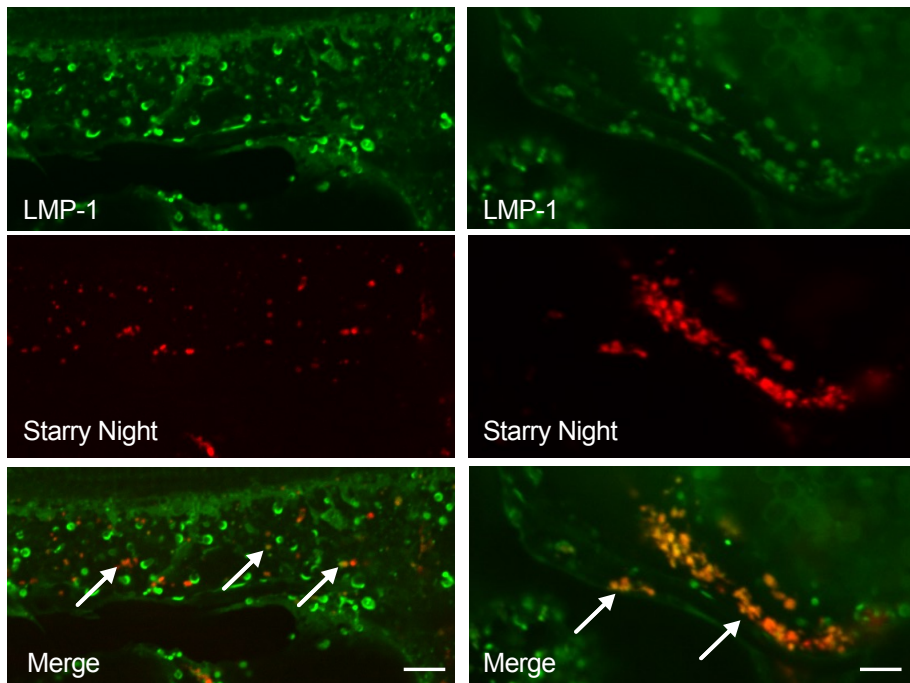**B**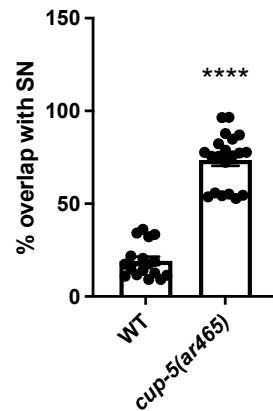**C**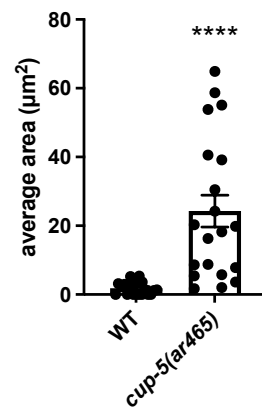**D**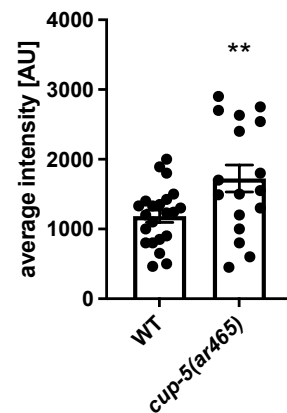**E**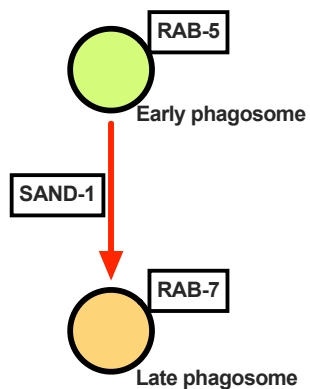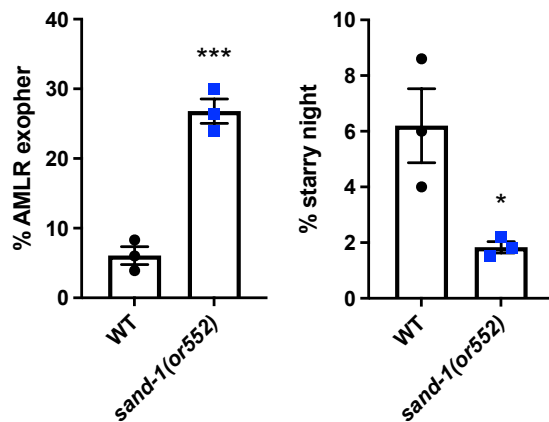**F**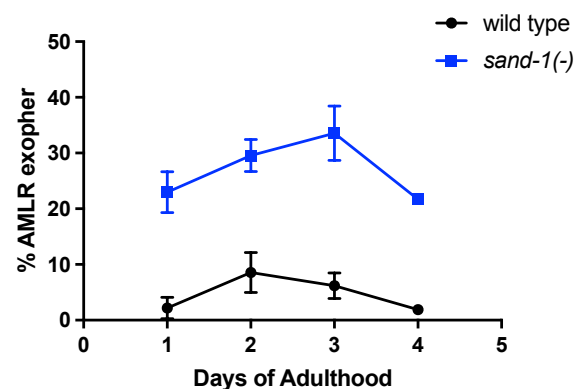

**A**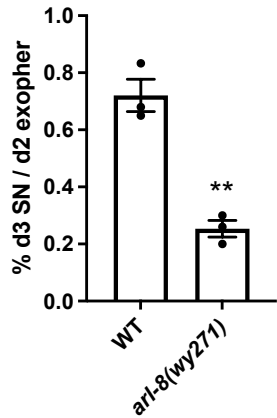**B**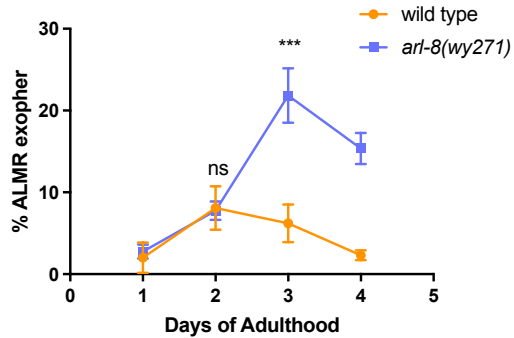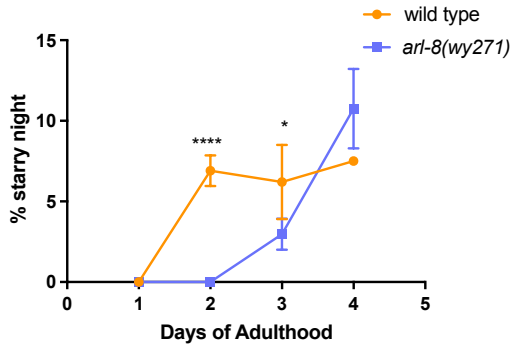

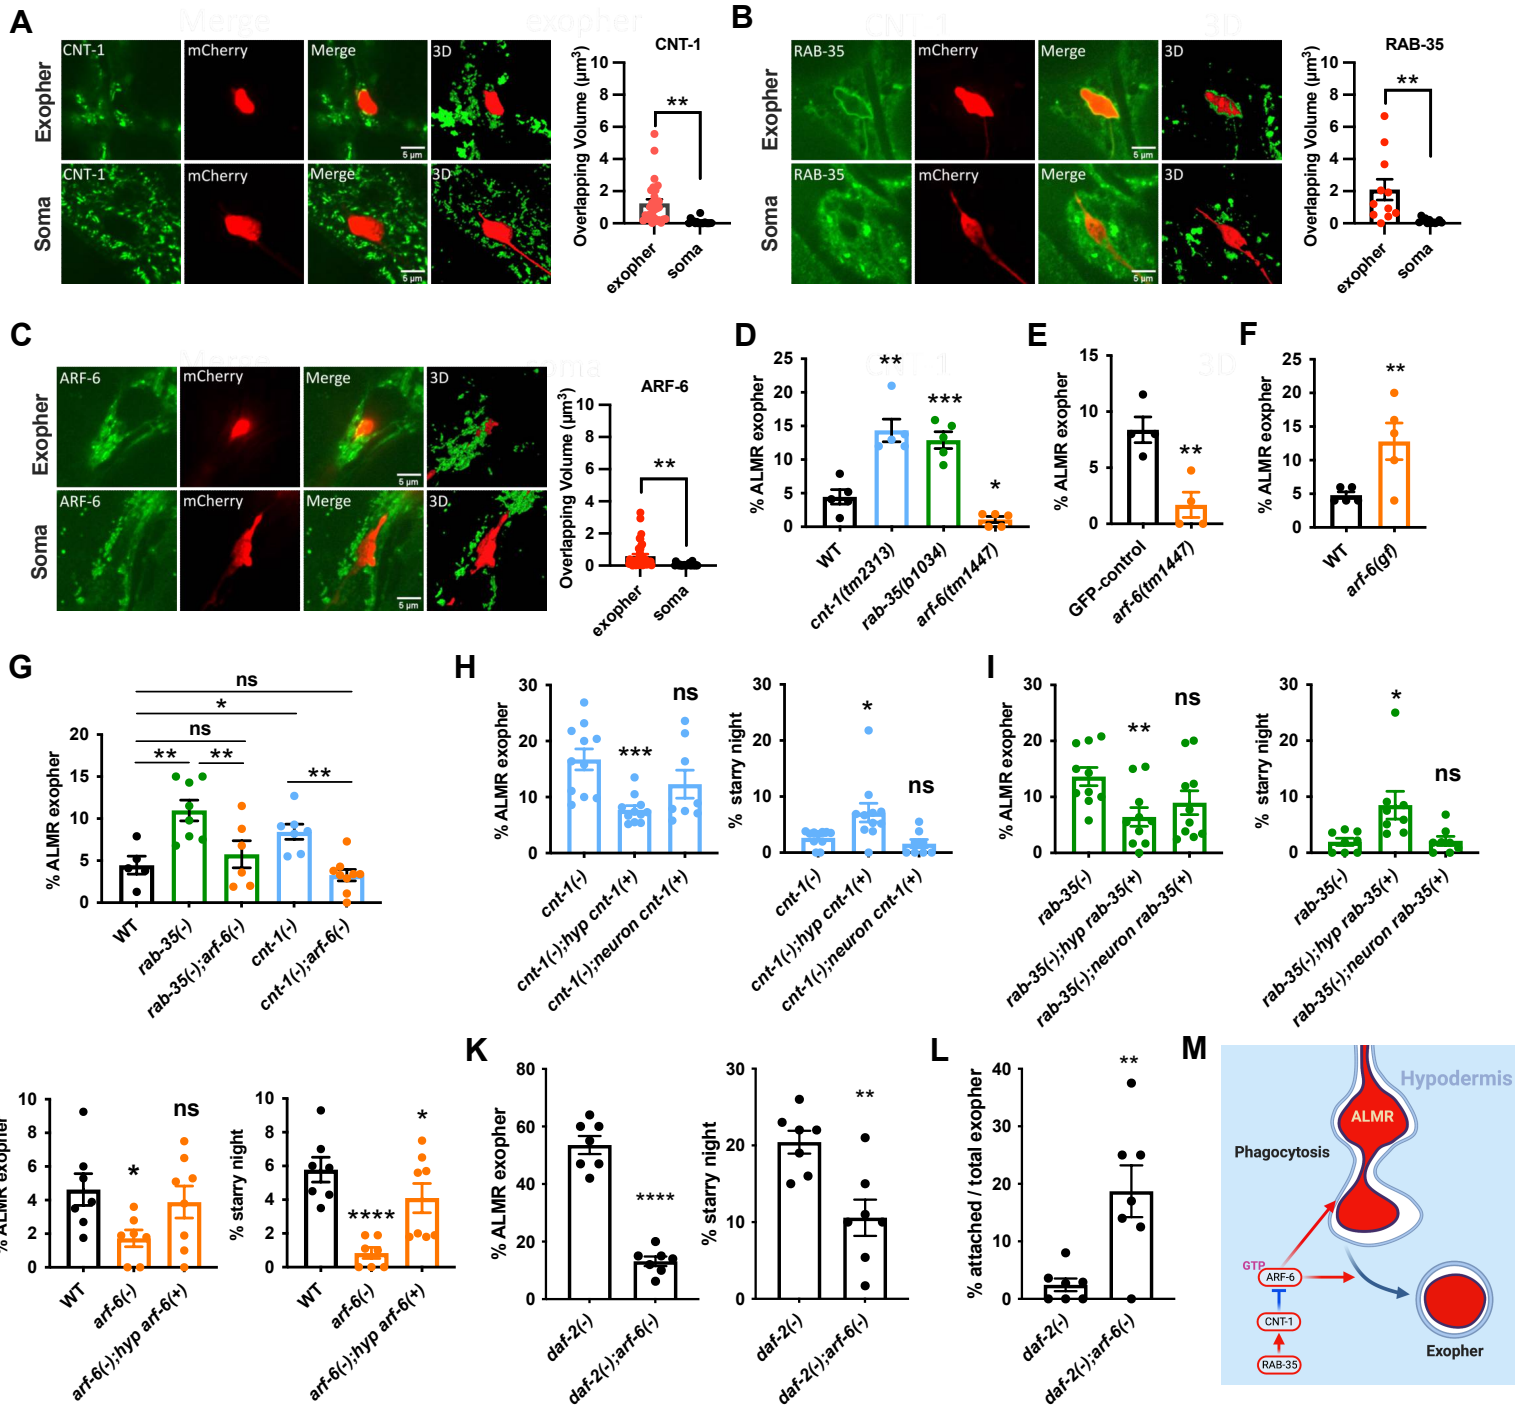

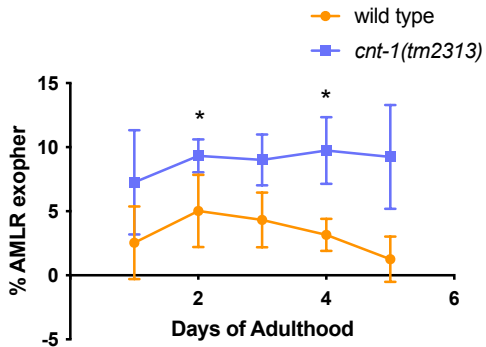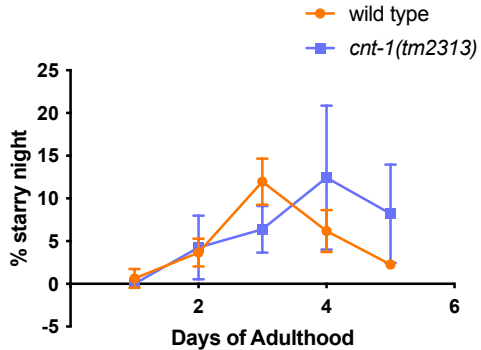

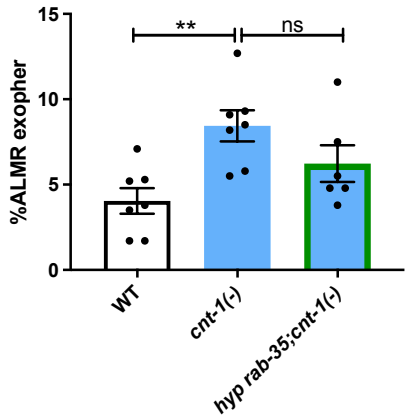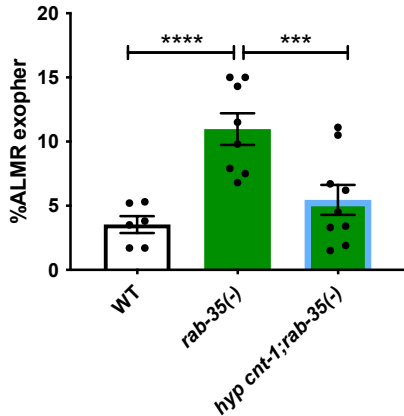

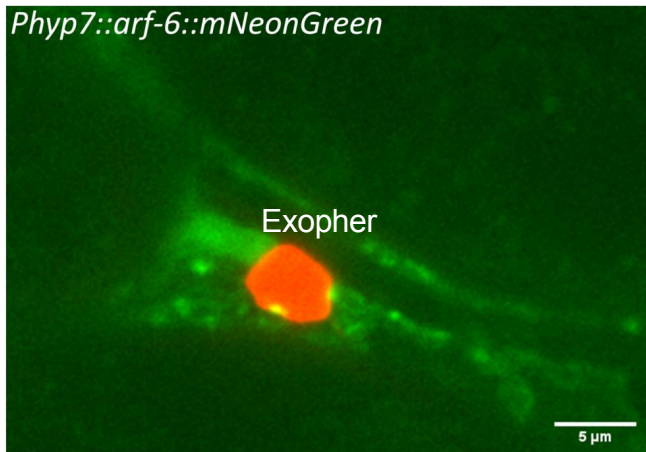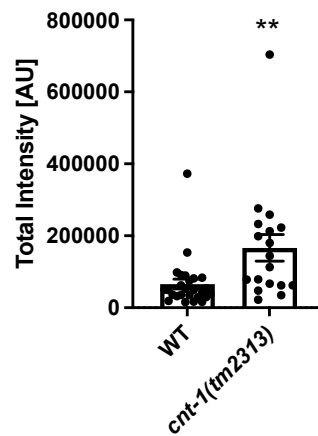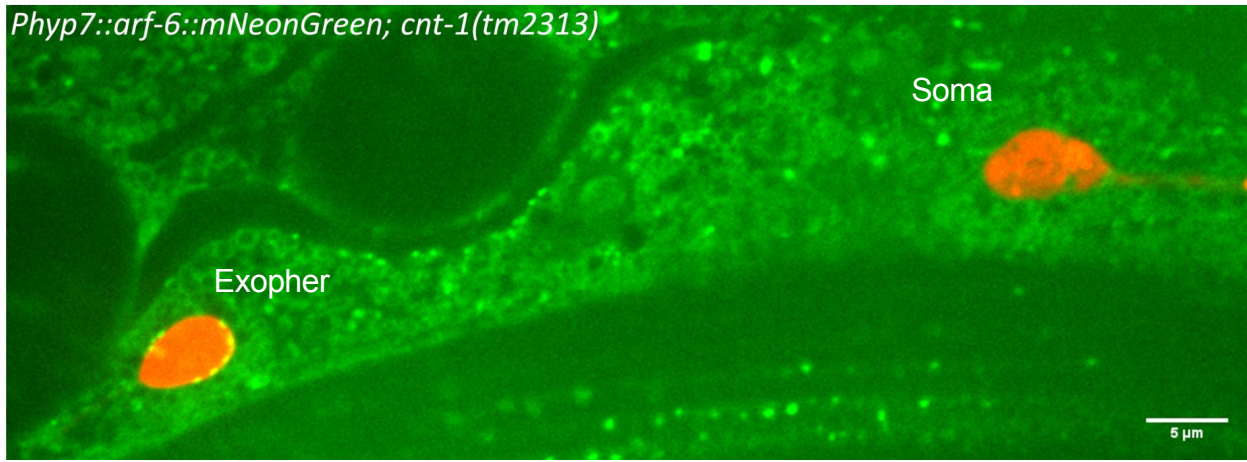

**A**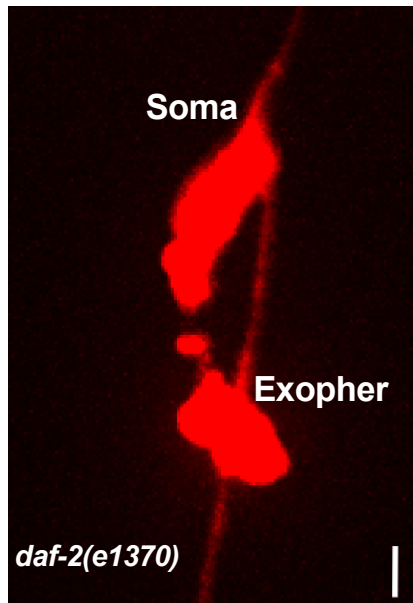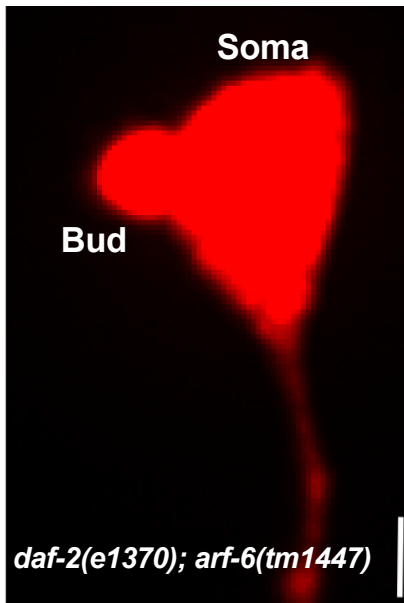**B**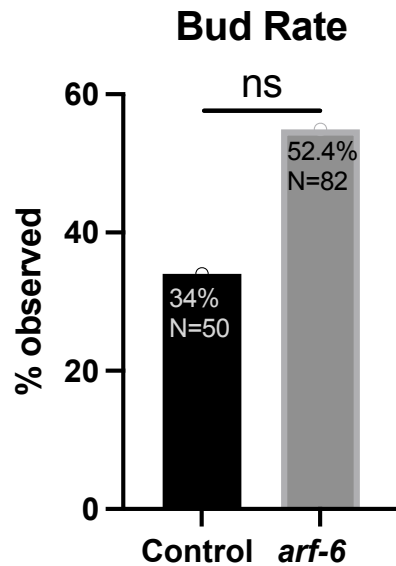

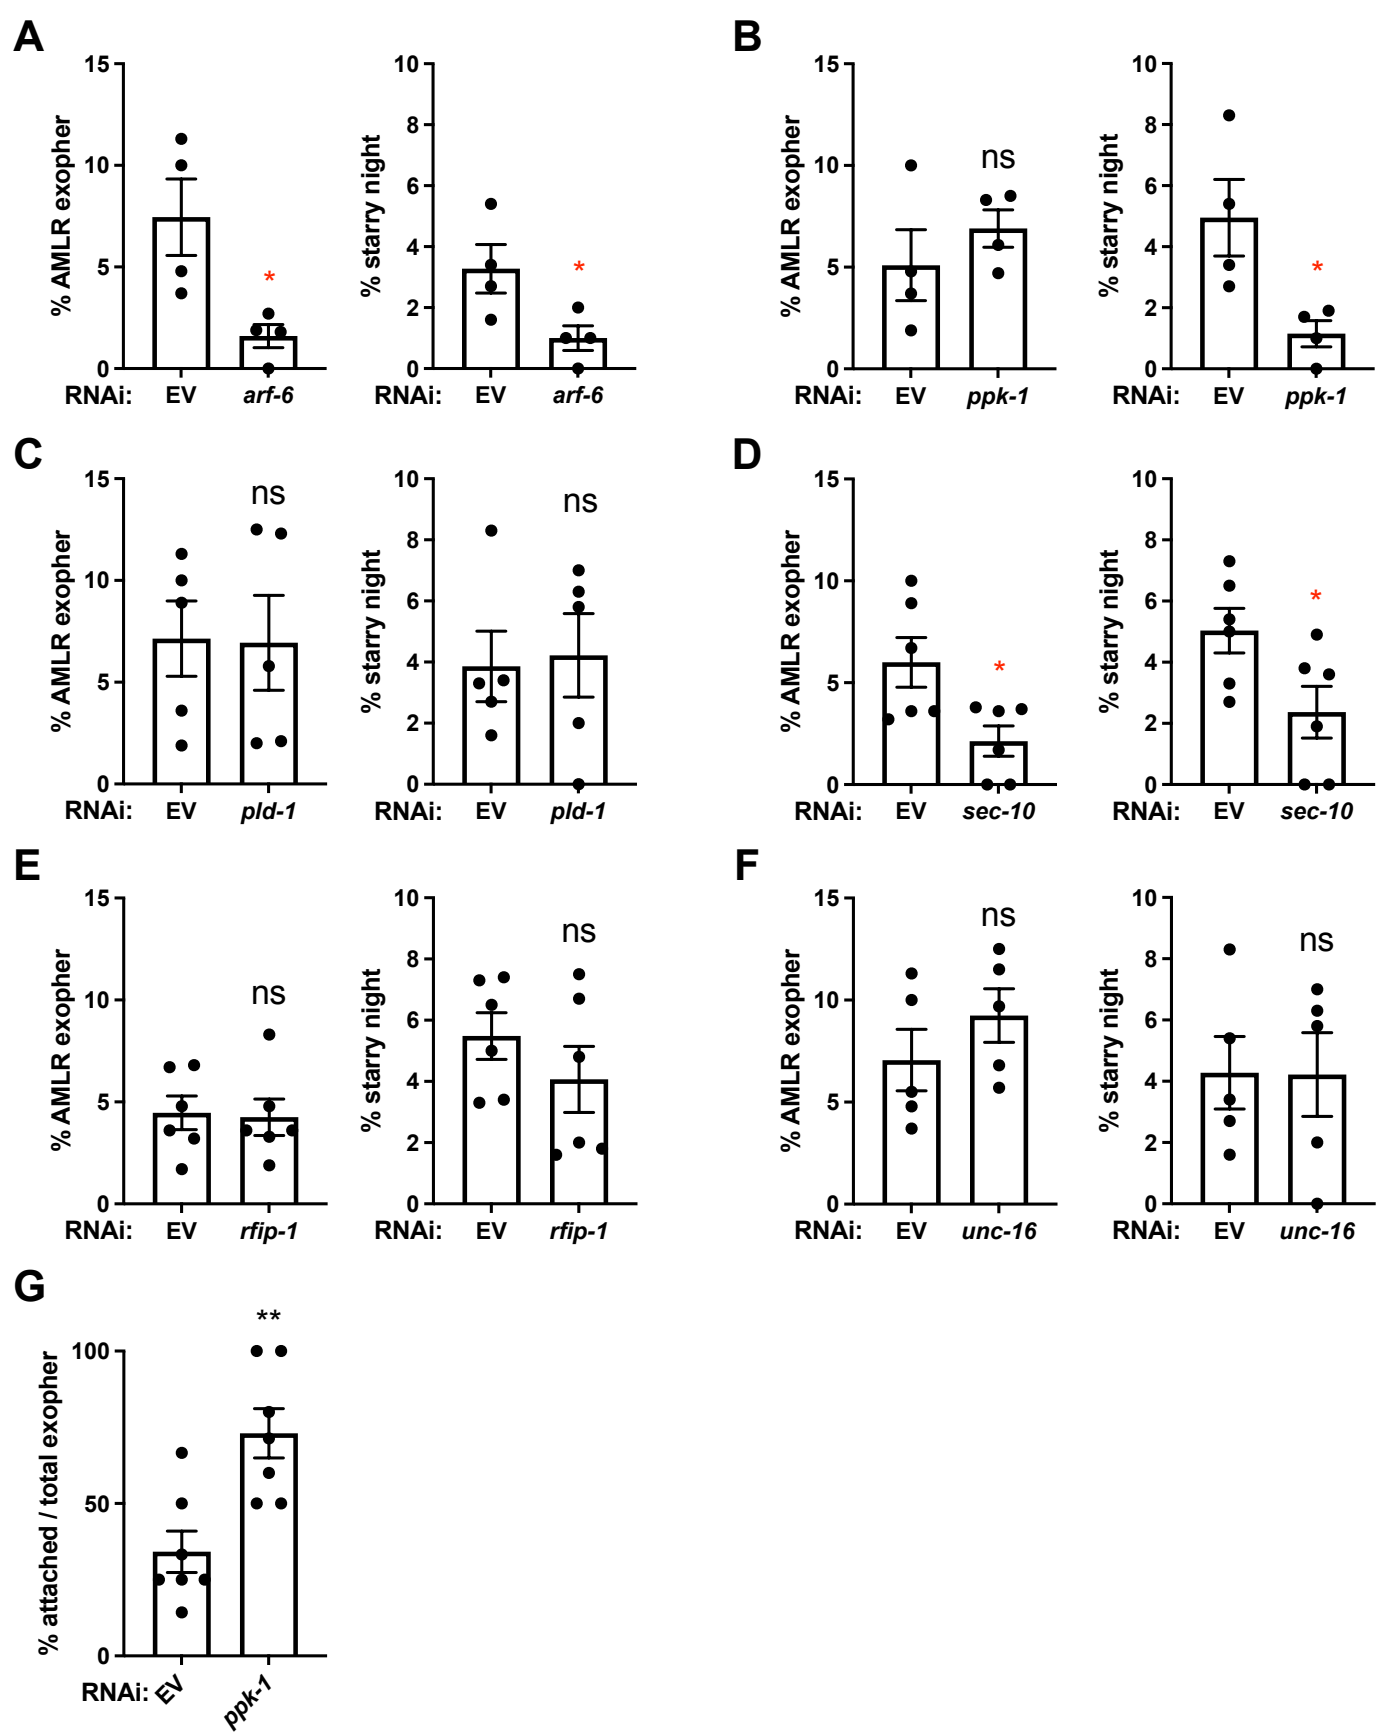



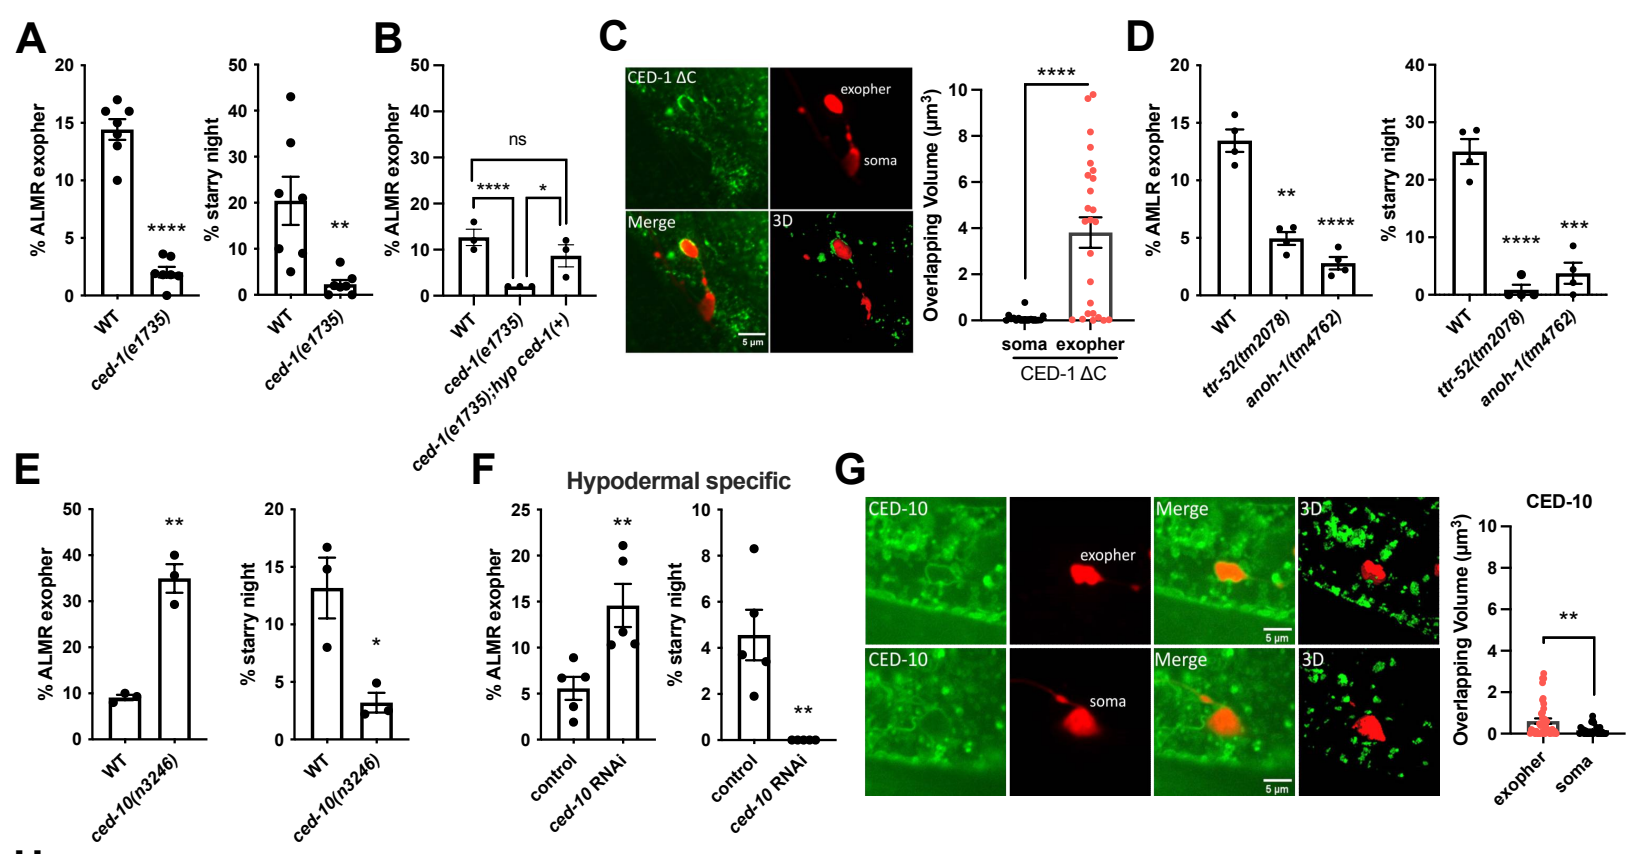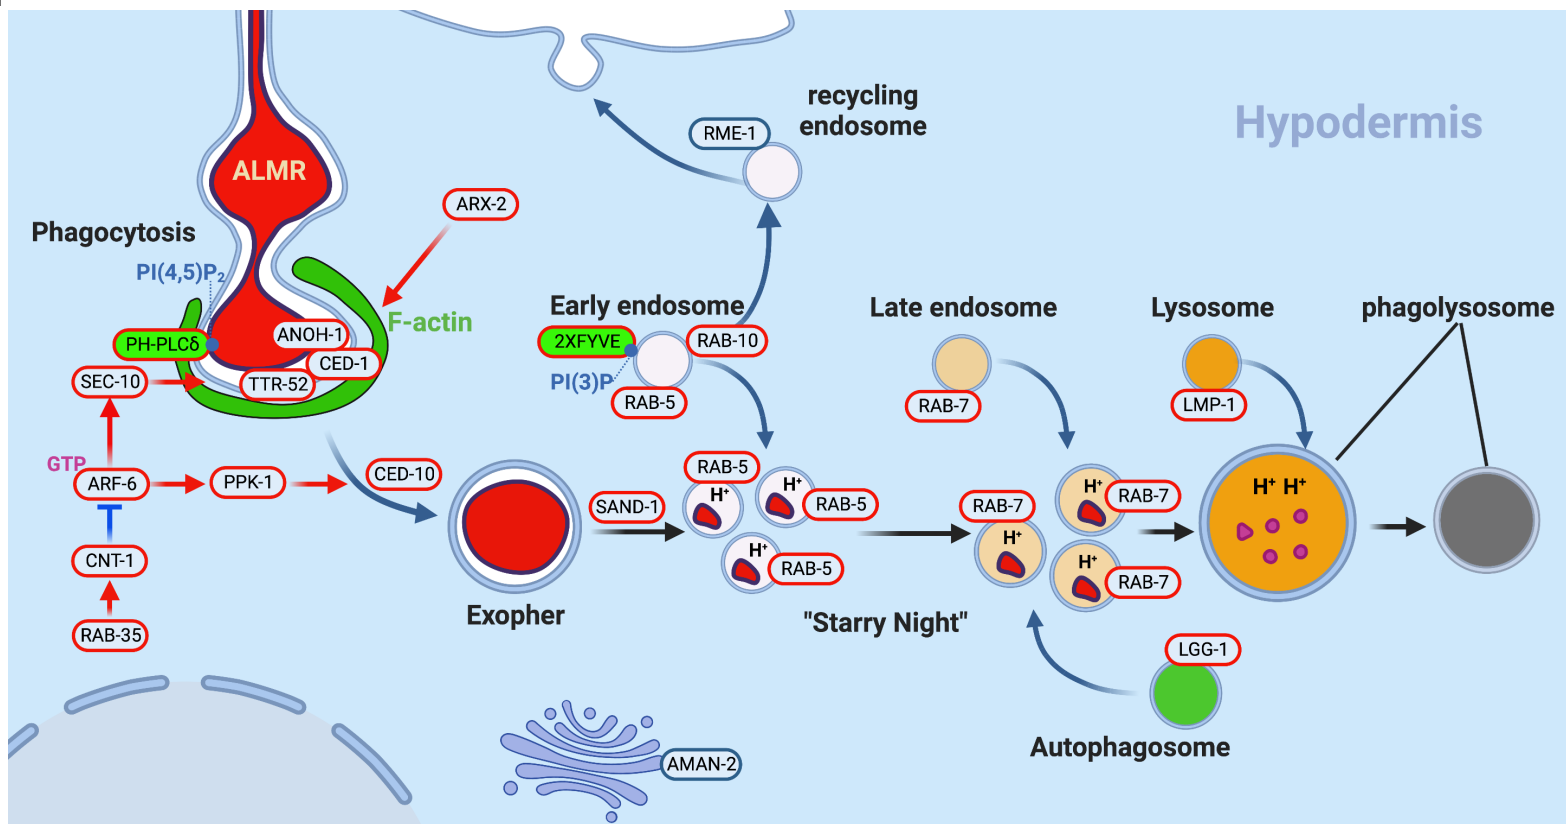

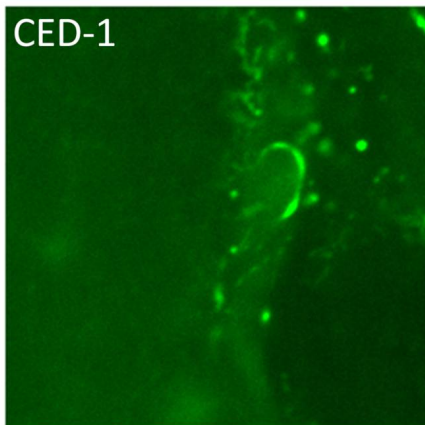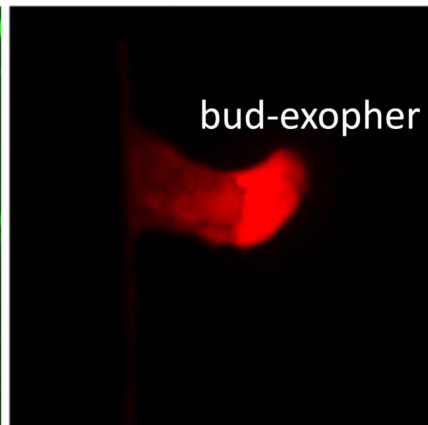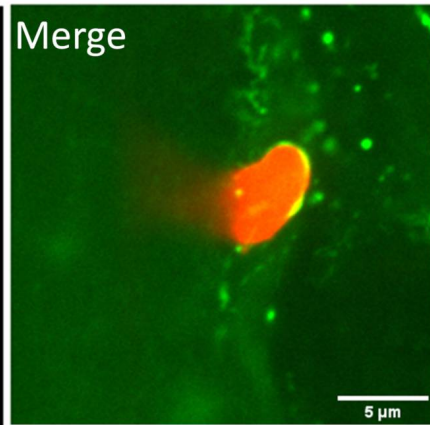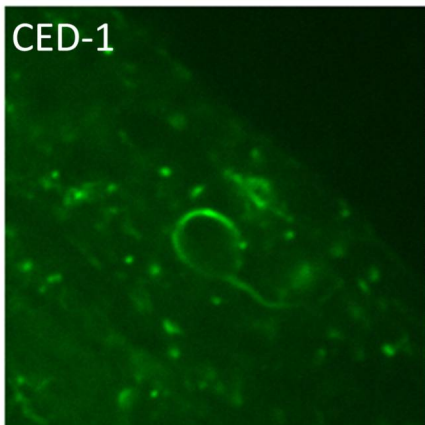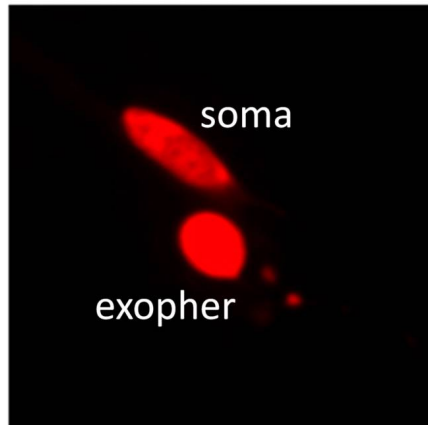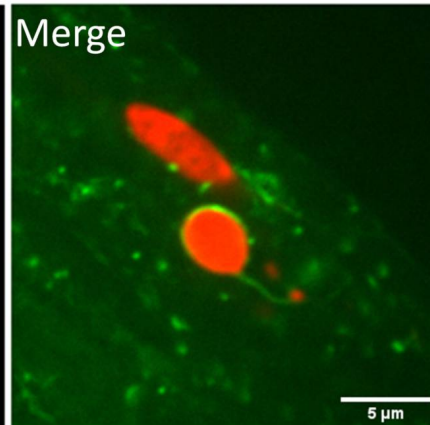

## Touch Sensitivity ARF-6

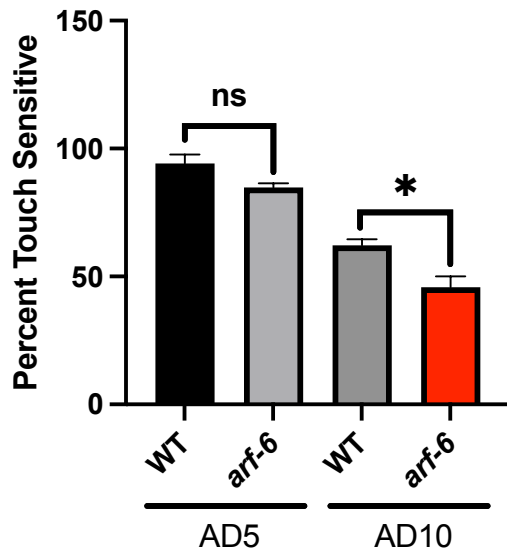

## Touch Sensitivity CED-1

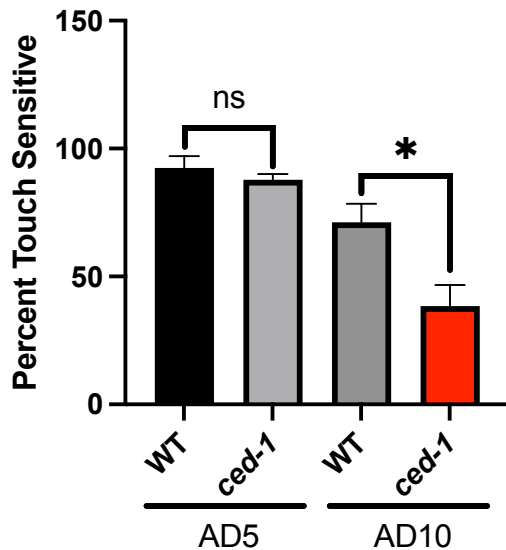

Source: http://biorxiv.org/content/10.1101/2022.07.31.502194v2.full.pdf
